## **Symptom Persistence Despite Improvement in Cardiopulmonary Health – Insights from longitudinal CMR, CPET and lung function testing post-COVID-19**

Brief Title: Longitudinal study of cardiopulmonary health in COVID-19

Mark Philip Cassar, MD (Melit.)<sup>a,b</sup>, Elizabeth M. Tunnicliffe, PhD<sup>a</sup>, Nayia Petousi, DPhil<sup>c,d</sup>, Adam J. Lewandowski, DPhil<sup>a</sup>, Cheng Xie, FRCR<sup>e,f</sup>, Masliza Mahmud, DPhil<sup>a,b</sup>, Azlan Helmy Abd Samat, DrEmMed<sup>a,b</sup>, Rachael A. Evans, PhD<sup>g,h</sup>, Christopher E. Brightling, MD<sup>g,h</sup>, Ling-Pei Ho, DPhil<sup>d,i</sup>, Stefan K. Piechnik, DSc<sup>a</sup>, Nick P. Talbot, DPhil<sup>d,j</sup>, David Holdsworth, DPhil<sup>d,j</sup>, Vanessa M. Ferreira, DPhil<sup>a,b</sup>, Stefan Neubauer, MD<sup>a,b,e</sup>, and Betty Raman, DPhil<sup>a,b,e</sup>

### **Affiliations**

- a. Division of Cardiovascular Medicine, Radcliffe Department of Medicine, National Institute for Health Research (NIHR) Oxford Biomedical Research Centre (BRC), University of Oxford, Oxford, United Kingdom
- b. Department of Cardiology, Oxford University Hospitals NHS Foundation Trust, Oxford, United Kingdom
- c. Nuffield Department of Medicine, University of Oxford, Oxford, United Kingdom
- d. Department of Respiratory Medicine, Oxford University Hospitals NHS Foundation Trust, Oxford, United Kingdom
- e. Radcliffe Department of Medicine, British Heart Foundation Centre for Research Excellence, University of Oxford, Oxford, United Kingdom
- f. Department of Radiology, Oxford University Hospitals NHS Foundation Trust, Oxford, United Kingdom
- g. NIHR Biomedical Research Centre (Respiratory theme), University Hospitals of Leicester NHS Trust, Leicester, UK
- h. Department of Respiratory Science, University of Leicester, Leicester, UK
- i. Weatherall Institute of Molecular Medicine, Nuffield Department of Medicine, University of Oxford, Oxford, United Kingdom
- j. Department of Physiology, Anatomy and Genetics, University of Oxford, Oxford, United Kingdom

### **Corresponding Author**

Dr Betty Raman

Oxford Centre for Clinical Magnetic Resonance Research  
Level 0, John Radcliffe Hospital  
Headington, Oxford, OX3 9DU  
United Kingdom

Email address: [Betty.raman@cardiov.ox.ac.uk](mailto:Betty.raman@cardiov.ox.ac.uk)

Telephone number: 00441865234580

## **Abstract**

### **Background**

The longitudinal trajectories of cardiopulmonary abnormalities and symptoms following infection with coronavirus disease (COVID-19) are unclear. We sought to describe their natural history in previously hospitalised patients, compare this with controls, and assess the relationship between symptoms and cardiopulmonary impairment at 6 months post-COVID-19.

### **Methods**

Fifty-eight patients and thirty matched controls underwent symptom-questionnaires, cardiac and lung magnetic resonance imaging (CMR), cardiopulmonary exercise test (CPET), and spirometry at 3 months following COVID-19. Of them, forty-six patients returned for follow-up assessments at 6 months.

### **Findings**

At 2-3 months, 83% of patients had at least one cardiopulmonary symptom versus 33% of controls. Patients and controls had comparable biventricular volumes and function. Native cardiac T<sub>1</sub> (marker of inflammation) and late gadolinium enhancement (LGE, marker of focal fibrosis) were increased in patients. Sixty percent of patients had lung parenchymal abnormalities on CMR and 55% had reduced peak oxygen consumption (pVO<sub>2</sub>) on CPET.

By 6 months, 53% of patients remained symptomatic. On CMR, indexed right ventricular (RV) end-diastolic volume ( $-4.3 \text{ mls/m}^2$ ,  $P=0.005$ ) decreased and RV ejection fraction ( $+3.2\%$ ,  $P=0.0003$ ) increased. Native T<sub>1</sub> and LGE improved and was comparable to controls. Lung parenchymal abnormalities and peak VO<sub>2</sub>, although better, were abnormal in patients versus controls. 31% had reduced pVO<sub>2</sub> secondary to fatigue and submaximal tests.

Cardiopulmonary symptoms in patients did not associate with CMR, lung function, or CPET measures.

### **Interpretation**

In patients, cardiopulmonary abnormalities improve over time, though some measures remain abnormal relative to controls. Persistent symptoms at 6 months post-COVID-19 did not associate with objective measures of cardiopulmonary health.

### **Funding**

NIHR Oxford and Oxford Health BRC, Oxford BHF CRE, UKRI and Wellcome Trust.

## Introduction

First described in December 2019,<sup>1</sup> severe acute respiratory syndrome coronavirus-2 (SARS-CoV-2), a beta coronavirus, is responsible for coronavirus disease (COVID-19). Our understanding of how this virus came to invade human cell lines has rapidly evolved, as the role of Angiotensin-converting enzyme-2 receptors in facilitating viral entry into cells was elucidated.<sup>2</sup> Angiotensin-converting enzyme-2 receptors are not only present in type II pneumocytes but are ubiquitously expressed by the vascular cells and other visceral organs.<sup>3</sup> The effect of SARS-CoV-2 on the heart is of particular importance, as it can cause a range of abnormalities including myocardial dysfunction, inflammation, and ischemic damage via direct (cytotoxic) and indirect (dysregulated immune response, thrombo-inflammation) mechanisms.<sup>4</sup> Myocardial injury is more common in moderate to severe infections and predictive of poor clinical outcomes among those admitted to hospital.<sup>5</sup> A number of recent studies have highlighted the role of cardiac magnetic resonance imaging (CMR) and cardiopulmonary exercise testing (CPET) in evaluating the mechanisms and functional consequences of cardiopulmonary injury in COVID-19 survivors.<sup>5-7</sup> Detailed assessments have typically been undertaken at a single time point within weeks to months after infection and do not reveal the natural history of cardiopulmonary pathology. A high burden of cardiopulmonary symptoms has also been reported and the role of contemporaneous investigations in elucidating the underlying cause for symptoms is unknown.

Previously, we undertook a holistic assessment of COVID-19 patients at 2-3 months following moderate to severe infection using symptom-based questionnaires, multiorgan magnetic resonance imaging (MRI), spirometry, and CPET.<sup>8</sup> We observed a high prevalence of tissue abnormalities involving the heart (26%) and lungs (60%) on MRI, together with reduced forced expiratory volume in 1 second (FEV<sub>1</sub>) and forced vital capacity (FVC) and marked exercise intolerance on CPET in patients. Here, we sought to describe the time course

evolution of cardiopulmonary symptoms, CMR, pulmonary function and CPET abnormalities in these patients from 2-3 months to 6 months and evaluate the relationship between symptoms and objective measures of cardiopulmonary health at 6 months.

This study was registered at ClinicalTrials.gov (NCT04510025) and approved in the United Kingdom by the North West Preston Research Ethics Committee (reference 20/NW/0235).

## **Methods**

### **Study population**

Fifty-eight patients with moderate to severe laboratory-confirmed (SARS-CoV-2 polymerase chain reaction positive) COVID-19, admitted for inpatient treatment at the Oxford University Hospitals National Health Service Foundation Trust, and 30 SARS-CoV-2 immunoglobulin negative controls, group-matched for age, sex, body mass index and risk factors (smoking, diabetes, and hypertension) from the community (recruited during the same period) were prospectively enrolled in this observational cohort study as previously described. A flow chart for recruitment is listed in the **Supplementary Material, p7**.

### **Study procedures**

Informed consent was obtained from all patients. Patient health questionnaires, cardiopulmonary magnetic resonance imaging, spirometry, CPET, electrocardiogram (ECG) and blood tests were undertaken in patients at 2-3 months and 6 months post-infection and at a single time point in controls. Gas transfer assessments were undertaken in patients at 6 months alone.

Disease severity was graded using the World Health Organisation ordinal scale for clinical improvement.<sup>9</sup> Patients with severe illness were defined as those having a score of  $\geq 5$  (high flow oxygen, non-invasive and invasive ventilation).

An electrocardiogram (ECG) was performed for every participant and interpreted according to the Minnesota Code of Electrocardiographic Findings.<sup>10</sup>

Patient health questionnaire-15 (PHQ-15)<sup>11</sup> was completed using an electronic data capture platform (CASTOR EDC, <https://www.castoredc.com>). The Medical Research Council (MRC) dyspnoea scale<sup>12</sup> and Fatigue Severity Scale (FSS)<sup>13</sup> were used to assess the prevalence and severity of breathlessness and fatigue, respectively (**Supplementary material, p3**).

CMR was carried out at 3 Tesla (Prisma, Siemens Healthineers, Erlangen, Germany) and included cine imaging to assess biventricular volumes, T<sub>1</sub> and T<sub>2</sub> mapping to assess myocardial inflammation and oedema, and post-contrast T<sub>1</sub> mapping and late gadolinium enhancement (LGE) imaging to assess diffuse and focal/patchy fibrosis. Lung abnormalities were assessed using Half-Fourier-acquisition single-shot turbo spin-echo (HASTE) MRI before the administration of contrast (**Supplementary Material, p3**).

CMR studies were analysed using CVI42 5.11.4 (Circle Cardiovascular Imaging, Calgary, Canada). All cardiac images were analysed by CMR experts (BR, MC) (**Supplementary Material, p4**). Lung images were qualitatively assessed for parenchymal involvement by an expert radiologist (CX), with the extent of lung parenchymal opacities scored as 0 (0%), 1 (1-25%), 2 (26-50%), 3 (51-75%), or 4 (76-100%).<sup>14</sup>

Spirometry, including FVC and FEV<sub>1</sub>, was performed as per recommended guidance.<sup>15</sup> Diffusion capacity for carbon monoxide (DL<sub>CO</sub>) and alveolar volume (V<sub>a</sub>) were measured using a ten-second single breath-hold technique with methane as the tracer gas, and adjusted for hemoglobin.<sup>16</sup>

Symptom-limited incremental CPET was undertaken using a cycle ergometer as previously described. Following two minutes of unloaded cycling, the work rate was increased to 20W, followed by a 10W/min ramp (**Supplementary Material, p5**).<sup>17</sup>

Blood-based testing consisted of complete blood count, biochemical analysis, coagulation testing, liver and renal function assessment, markers of cardiac injury (troponin T and N-terminal pro-brain natriuretic peptide/NT-proBNP), and measures of electrolytes, C-reactive protein (CRP), and procalcitonin.

Details on clinical symptoms, signs, vitals, and laboratory findings during admission were extracted from electronic medical records.<sup>18</sup>

## **Statistics**

Continuous variables were described using mean and standard deviation for variables with parametric data across all groups. When non-parametric data was present in one or more groups, median and interquartile range (IQR) was used to facilitate comparison. Normality was assessed by the Shapiro-Wilk test. Group differences were evaluated using Student's t-tests, Mann-Whitney U-tests, paired Student's t-tests, and Wilcoxon Signed Ranks tests as appropriate. Categorical variables were reported as frequency and percentages, with group differences evaluated using the Chi-square test, Fisher's exact test, Fisher-Freeman-Halton exact test, Stuart-Maxwell test, or McNemar test as appropriate. Spearman's correlation coefficients were used to describe the relationship between two variables where relevant. Univariate binary logistic regression was used to determine the association of cardiopulmonary symptoms (chest pain, palpitations, syncope, dyspnoea, or dizziness) and objective measures of cardiopulmonary health. For any univariate association with a *P*-value of <0.05, we planned to undertake a multivariable logistic regression.

In a separate analysis, determinants of breathlessness were also ascertained (**Supplementary Material, p8**). The conventional level of statistical significance of 5% was used. Statistical analyses were performed using SPSS Version 27.0 (IBM, Armonk, NY, USA).

## Results

Baseline characteristics of all patients and controls are listed in **Table 1**.<sup>19</sup>

Of the 58 patients recruited, 46 (79%) returned for follow-up assessments. Mean age of patients was 55±13 years. Thirty-four (59%) were men (**Table 1**). Thirteen (22%) belonged to Black (7/13) and Asian (6/13) ethnic groups. Twenty (34%) patients required non-invasive ventilation or intubation. Median duration of hospitalization was 9 days (IQR 5-17). The first assessment took place at a median interval of 2·3 months (IQR 2·1–2·5) from disease onset and second took place at 6·0 months (IQR 6·0 – 6·8).

On admission, all patients had a raised CRP (>10mg/L), 47% had lymphopenia, and 21% were anaemic. By 6 months, CRP was raised in 13%, compared to none in controls ( $P=0\cdot076$ ), lymphocyte count normalized, and the proportion of those with anaemia was comparable to controls (11% versus 13%,  $P=1\cdot0$ ) (**Table 2**).

As previously reported, troponin on admission (measured in 38 patients) was abnormal in three (5%) patients. By 2-3 and 6 months, none had elevated high-sensitivity troponin levels (>34ng/L).

Only four patients had NT-proBNP measured during admission. At 2-3 months, this was elevated in 11 (20%), reducing to eight (17%) patients at 6 months versus 11% in controls ( $P=0\cdot52$ ).

## Electrocardiography



ECG analysis revealed atrial fibrillation in one patient at both assessments, with all other study participants (both patients and controls) demonstrating sinus rhythm.

Prevalence of bundle branch block, ST-segment elevation/depression and T wave inversion did not differ between patients (on both visits) and controls ( $P>0.05$  for all variables).

### **Symptom burden**

Symptom prevalence in patients and controls are listed in **Table 3**. As a whole, 98% had one or more symptoms (cardiopulmonary and non-cardiopulmonary) at 2-3 months from infection, reducing to 89% by 6 months. Prevalence of cardiopulmonary symptoms (chest pain, palpitations, syncope, dyspnoea or dizziness) in patients was 83% at 2-3 months and dropped to 53% at 6 months ( $P=0.0001$ ). At 6 months, symptoms of breathlessness (MRC) and fatigue (FSS) were worse in patients than controls (MRC grade  $\geq 2$ : 57% vs 10%,  $P<0.0001$ ; Mean FSS  $\geq 4$ : 44% vs 17%,  $P=0.023$ , **Table 3**).

### **Serial Cardiac Imaging**

Left ventricular (LV) volumes, mass, and function were not different between patients (at 2-3 months and 6 months) and controls (**Table 4**). At 6 months, two (4.5%) patients had an LV ejection fraction (LVEF) just below the cut-off of 50% (49.6 and 49.8%). Those with severe illness had lower LVEF at 6 months than other patients ( $60.8\pm 6.6\%$  vs  $64.8\pm 6.5\%$ ,  $P=0.049$ ). None of the patients had a history of pre-existing cardiac failure.

Right ventricular (RV) volumes, mass and function did not differ between patients (at 2-3 months and 6 months) and controls (**Table 4**). In patients, indexed RV end-diastolic volume decreased (mean difference  $-4.3$  mls/m<sup>2</sup>,  $P=0.005$ ) and function (RVEF) increased (mean difference  $+3.2\%$ ,  $P=0.0003$ ) from 2-3 months to 6 months (**Figure 1**). At 6 months, RVEF tended to be lower in patients with severe illness ( $58.5\pm 5.1\%$  vs  $62.1\pm 6.9\%$ ,  $P=0.055$ ).

Basal and mid-ventricular native  $T_1$  (a biomarker sensitive to inflammation) values were higher in patients than controls (**Table 4**). By 6 months, myocardial native  $T_1$  decreased and was no longer different from control  $T_1$  (**Table 4; Figure 1**).

Native  $T_2$  (a biomarker sensitive to oedema) was not significantly different between patients and controls.

Extracellular volume fraction (ECV, a biomarker sensitive to diffuse fibrosis) did not differ between patients and controls. In patients, slice-averaged ECV decreased (mean difference -1.13%,  $P=0.005$ ) from 2-3 months to 6 months post-infection.

LGE (measured as % of myocardial volume, a biomarker of focal fibrosis) was slightly higher in patients than controls at 2-3 months ( $P=0.023$ ). By 6 months, this did not differ from controls ( $P=0.62$ ). There were six patients with LGE in a myocarditis pattern and one with evidence of subendocardial infarction (elevated troponin during admission). None of the patients satisfied the updated Lake Louise criteria<sup>20</sup> for active myocarditis (increased native  $T_1$ /LGE and increased native  $T_2$ ) at 6 months.

### **Lung imaging and functional assessment**

At 2-3 months, 60% of patients had lung parenchymal abnormalities, becoming less extensive (**Table 4**) with time, but were still more common compared to controls at 6 months ( $P<0.0001$ ). Forty percent of patients had lung parenchymal abnormalities involving more than half the lung at 3 months. This reduced to 9% by six months.

At 2-3 months, patients had lower FEV<sub>1</sub> and FVC compared to controls but most values remained within the normal range (**Table 5**). At 6 months, FEV<sub>1</sub> was no longer different from controls ( $P=0.10$ ), whereas FVC remained slightly lower ( $P=0.024$ ). Reduced gas transfer (DL<sub>CO</sub> <80% predicted) and reduced accessible lung volume ( $V_A$ ) were seen in 24 patients (52%). Reduced transfer coefficient for carbon monoxide ( $K_{co}$ ) was present in six patients

(13%). Patients with parenchymal abnormalities had lower DLco compared to those without (77% vs 91%,  $P=0.009$ ). DLco was not significantly different in patients with severe illness at admission versus non-severe patients (77.4% vs 84.5%,  $P=0.15$ ).

### **Serial Cardiopulmonary Exercise Testing**

As previously reported, patients had reduced peak oxygen consumption ( $VO_2$ ) at 2-3 months. By 6 months, this improved but was still reduced relative to controls (**Table 6, Figure 2**).

Maximal test criteria consisted of a respiratory exchange ratio  $\geq 1.1$  and plateau in oxygen uptake.<sup>21</sup> At 2-3 months, 49% of patients had submaximal tests (versus 15% of controls,  $P=0.003$ ). By 6 months, this prevalence reduced to 26% ( $P=0.37$  for comparison with controls).

In those with a maximal test, maximal  $VO_2$  was lower in patients at 2-3 months but was no longer so by 6 months ( $P=0.12$  for comparison with controls).

The ventilatory equivalent for carbon dioxide ( $VE/VCO_2$ ) slope, a marker of ventilatory efficiency, was abnormal in patients at 2-3 months and improved by 6 months ( $P=0.033$ ). In spite of this, the  $VE/VCO_2$  slope remained borderline abnormal (median 31.3 (IQR 28.6-34.5)) versus controls (median 28.2 (IQR 26.7-30.0,  $P=0.002$ )). Reduced ventilatory efficiency had little effect on exercise capacity, with respiratory limitation (defined as a breathing reserve of less than 20% at peak exertion) only occurring in 6% and 5% of patients at 2-3 and 6 months, respectively. This did not differ from controls (4%,  $P=1.0$ ).

At 2-3 months, oxygen ( $O_2$ ) pulse in maximal tests (a surrogate measure of exercise stroke volume) was lower in patients versus controls and was accompanied by earlier attainment of the anaerobic threshold (AT). By 6 months,  $O_2$  pulse improved and became comparable to controls (95% of predicted vs 103% of predicted,  $P=0.13$ ). Despite improvement in the AT,

occurring later during exercise, it remained different from controls (42% of predicted VO<sub>2</sub>max vs 47% of predicted VO<sub>2</sub>max,  $P=0.041$ , **Table 6**).

Heart rate recovery (HRR) in the first minute following exercise cessation was slower in patients compared to controls (16.6 vs 21.9 beats,  $P=0.018$ ). By 6 months, HRR improved significantly (22.2 beats,  $P=0.001$ ), and became comparable to controls ( $P=0.67$ ). The severity of illness during admission was not associated with a reduction in peak or maximal oxygen consumption at 2-3 months and 6 months ( $P>0.20$  for all comparisons).

### **Relationship between symptoms and cardiopulmonary health**

At 6 months from infection, neither CMR nor pulmonary function or CPET parameters associated with cardiopulmonary symptoms (**Figure 3**) or breathlessness (**Supplementary Material, p8**). Longitudinal improvement in CMR and CPET parameters did not associate with improvement in cardiopulmonary symptoms from 2-3 months to 6 months ( $P>0.05$ ). There was no correlation between the extent of lung abnormalities on MRI, lung function parameters (FEV<sub>1</sub>, FVC, FEV<sub>1</sub>/FVC, DLco) and breathlessness scores (**Supplementary Material, p5**). The dissociation between physiological measurements and symptoms were further highlighted by the fact that of the twenty patients who did not report significant breathlessness (MRC grade <2) at 6 months, 55% had abnormal gas transfer (DLco <80% predicted).

### **Discussion**

The main findings from our study are as follows: First, serial measures of cardiopulmonary health on CMR in moderate to severe COVID-19 improve over time. Second, exercise tolerance in patients recovers at 6 months post-infection but is still abnormal in some when compared to controls, due to muscular fatigue and weakness. Third, although cardiopulmonary symptom burden improves, more than half the patients remain

symptomatic, and neither CMR nor pulmonary function or CPET measures associate with persistent symptom burden.

Since the start of the pandemic, several studies have harnessed the power of CMR to better understand the mechanisms underlying myocardial injury associated with COVID-19.<sup>6,22</sup> Prevalence estimates of injury have varied due to differences in cohort characteristics and methodologies used. In the largest CMR follow-up study of patients with elevated troponin, Kotecha and colleagues observed that up to 49% of patients have evidence of either myocarditis or myocardial ischemia/infarction.<sup>22</sup> By contrast, similar-sized studies of younger athletes<sup>23</sup> and older individuals<sup>6</sup> with milder infections (predominantly non-hospitalised) have reported variable estimates of myocardial injury (ranging from 1.5% to 70%). The present study is unique to others in the literature, as we prospectively recruited hospitalised COVID-19 patients and risk factor matched controls (who served as our reference) and longitudinally evaluated changes in CMR myocardial tissue characteristics in patients. Here, we show that whilst there were some patients with abnormal myocardial native T<sub>1</sub> (a marker of oedema and inflammation) at 2-3 months, native T<sub>1</sub> normalized in the majority by 6 months and was accompanied by a decrease in extracellular volume. These findings highlight two important points. The first is that early tissue abnormalities on CMR are likely due to dynamic alterations in the extracellular environment (hyperaemia<sup>24</sup> or changes in extracellular proteins/matrix) influenced by circulating cytokines and importantly, not explained by comorbidities alone. This is in line with recent studies that have also demonstrated temporal changes (improvement) in inflammatory cytokines (IL-1, IL-2, IL-6, IL-18, TNF, IFNL1) in COVID-19 patients on serial assessments.<sup>25,26</sup> The second is that cardiac health is restored in the majority of patients by 6 months. Only two patients had borderline low LV function, RV parameters were normal and there were no cases of active myocarditis (as per the updated Lake Louise criteria<sup>20</sup>). These findings are in keeping with

the low prevalence (7%) of cardiac dysfunction (defined by levels of NT-BNP) reported by a large UK-wide prospective follow-up study of post-hospitalised COVID-19 patients by Evans and colleagues.<sup>27</sup>

Exercise intolerance is common among patients recovering from coronavirus infections (SARS, MERS, and COVID-19).<sup>7,8,28,29</sup> We had previously shown that at 2-3 months<sup>8</sup>, CPET revealed a number of abnormalities in patients. By 6 months, many of these parameters improved, though VE/VCO<sub>2</sub> slope, AT, and frequency of submaximal tests were still abnormal in patients. Of importance, cardiopulmonary limitations were not felt to be the main driver of exercise intolerance by 6 months as reduced peak oxygen consumption was only seen in symptom-limited submaximal tests. Other CPET studies of COVID-19 patients have also demonstrated a high proportion of submaximal tests.<sup>30</sup> In one study, direct assessment of maximum muscle strength using dominant leg extension independently predicted peak oxygen consumption in patients following COVID-19.<sup>7</sup> Taken together, these findings strongly suggest that muscular conditioning and fitness are important determinants of exercise tolerance and highlight the role of dedicated rehabilitation in augmenting recovery.

Postural orthostatic tachycardia and other manifestations of dysautonomia have frequently been described among patients post-COVID-19.<sup>31,32</sup> Here, we showed that at 2-3 months, heart rate recovery, an indirect measure of autonomic health, was impaired in patients compared to controls.<sup>33</sup> By six months, heart rate recovery improved, implying that dysautonomia may be transient and does spontaneously recover in some patients.

An interesting observation from serial CPET assessments was that O<sub>2</sub> pulse, a marker of exertional stroke volume, was reduced in patients at 2-3 months and normalized by 6 months. Reduced O<sub>2</sub> pulse has also been observed in a recent study by Baratto et al.,<sup>34</sup> where impaired tissue oxygen extraction has been implicated. Increased pulmonary vascular resistance (PVR)

can also explain the reduced O<sub>2</sub> pulse and may occur secondary to SARS-CoV-2 associated endothelial cell injury, impaired vasodilation,<sup>35</sup> and/or persistent thrombo-embolic manifestations.<sup>36</sup> Given that the RV is extremely sensitive to changes in PVR, the observed improvement in O<sub>2</sub> pulse and RV function by 6 months could reflect restoration of pulmonary vascular homeostasis in patients.

As the COVID-19 pandemic has progressed, our understanding of the long-term effects of SARS-CoV-2 infection has evolved.<sup>37-39</sup> Multiple studies<sup>5,27</sup> have demonstrated that some patients recovering from COVID-19 experience a diverse range of persistent symptoms months beyond infection, commonly referred to as “long haul COVID” or “post-COVID-19 syndrome”.<sup>39,40</sup> In the present study, 1 in 2 patients reported persistent cardiopulmonary symptoms ((chest pain, palpitations, syncope, dyspnoea or dizziness)) at 6 months, despite an improvement in symptoms from 3 months. Neither CMR nor CPET or pulmonary function measures were associated with enduring symptoms. These findings highlight the reduced yield of standard clinical investigations in elucidating a cause for persistent symptoms and the need to explore other mechanisms (sarcopenia, muscle weakness, neurohormonal factors, autoantibodies, nociceptive alterations, mast cell activation syndrome) that may be relevant.<sup>41-45</sup> Another important finding from this study is that more than half the patients who were asymptomatic had impaired DLco at 6 months, implying that physiological recovery may not be reliably captured by subjective measures of cardiopulmonary health. Further efforts are needed to better understand the determinants of impaired DLco and persistent parenchymal abnormalities associated with COVID-19, as we seek to develop effective treatments that could potentially reverse the long-term sequelae of COVID-19.

Although the sample size of this study is small, it has many strengths. To our knowledge, this is the first study to comprehensively (cardiopulmonary imaging, static physiology, whole-body exercise testing, patient health questionnaires) evaluate the longitudinal trajectory of

cardiopulmonary abnormalities on CMR and CPET in patients at 3 and 6 months. From a diagnostic perspective, our study provides important insight into the lack of association between symptoms and results from standard clinical investigations. The longitudinal design and incorporation of risk factor matched control group clarified the relevance of some early abnormalities. While it was difficult to exclude significant inducible ischemia, none of the patients stopped their CPET because of angina or ischemic ECG changes. Arterial blood gas sampling or echocardiography during CPET were lacking and did not permit assessment of tissue oxygen extraction, cardiac output during exercise and pulmonary dead space. Not all patients came back for follow-up assessments (due to work commitments or had moved abroad; see supplement for details) which could in turn bias prevalence estimates in this study. However, this would not affect the relationship between symptoms and objective measures of cardiopulmonary health.

## **Conclusion**

Our study provides novel insights into the trajectory of cardiopulmonary symptoms and abnormalities on serial CMR, spirometry and CPET in patients. At 6 months, cardiac abnormalities on CMR improved in the majority of patients and were not different to matched controls. Parenchymal abnormalities, lung function impairment and CPET improved but were still abnormal relative to controls. Nearly half the patients continue to experience symptoms at 6 months. There was a surprising dissociation between persistent cardiopulmonary symptoms and CMR/CPET parameters, underscoring the need to examine alternative mechanisms for symptom persistence in patients.



## **Declaration of interests**

MC reports a grant from the NIHR Oxford Biomedical Research Centre. EMT reports a grant from the NIHR Oxford Biomedical Research Centre and is a shareholder in Perspectum. AL is a shareholder in Perspectum. SKP has a US patent (6)1/387,591 licensed to Siemens and US patents 61/630,508 and 61-630,510 licensed to Perspectum. VMF reports grants from the British Heart Foundation and the National Institute Health Research Oxford Biomedical Research Centre. SN reports grants from the NIHR Oxford Biomedical Research Centre and UK Research and Innovation and is a shareholder in Perspectum. SN was a board member and consultant to Perspectum until 2019. SN has US patents 61/630,508 and 61-630,510 licensed to Perspectum. BR reports grants from the Oxford British Heart Foundation Centre for Research Excellence, the NIHR Oxford Biomedical Research Centre and the United Kingdom Research Innovation Award. All other authors do not have relationships with industry or funding sources to declare.

## **Acknowledgements**

The authors' work was supported by the NIHR Oxford and Oxford Health Biomedical Research Centre, Oxford British Heart Foundation (BHF) Centre of Research Excellence, United Kingdom Research Innovation and Wellcome Trust. This project is part of a tier 3 study (C-MORE) within the collaborative research programme entitled PHOSP-COVID Post-hospitalization COVID-19 study: a national consortium to understand and improve long-term health outcomes. Funded by the Medical Research Council and Department of Health and Social Care/National Institute for Health Research Grant (MR/V027859/1) ISRCTN number 10980107.

This work also arises from one of the national "COVID-19 Cardiovascular Disease Flagship Projects" designated by the NIHR-BHF Cardiovascular Partnership.

The sponsors played no role in the design of the study; collection, analysis and interpretation of data; in writing the manuscript, and in the decision to submit the paper for publication. The views expressed are those of the authors and not necessarily those of the National Health Service, NIHR, or the United Kingdom Department of Health.

All authors had full access to all the data in the study and accept responsibility to submit for publication.

We thank our participants and their families who have given their time to help others understand the medium to long-term effects of COVID-19. We are grateful to the University of Oxford and Oxford University Hospital Trust for their support of this study. We would like to acknowledge OCMR staff, Ms Hanan Lamlum, Ms Rebecca Mills, Ms Polly Whitworth, Ms Claudia Nunes, Ms Harriet Nixon, Ms Liliana Da Silva Rodrigues, Ms Kinga Varnai and Ms Catherine Krasopoulos for their help with this work. We acknowledge the support of Siemens in providing WIP 1048 for cardiac T<sub>1</sub> mapping.

### **Data sharing statement**

The data underlying this article will be shared on reasonable request to the corresponding author, subject to institutional and ethical committee approvals.

## 1   **References**

- 2   1.     Wang C, Horby PW, Hayden FG, Gao GF. A novel coronavirus outbreak of global  
3 health concern. *Lancet* 2020; **395**(10223): 470-3.
- 4   2.     Hoffmann M, Kleine-Weber H, Schroeder S, et al. SARS-CoV-2 Cell Entry Depends  
5 on ACE2 and TMPRSS2 and Is Blocked by a Clinically Proven Protease Inhibitor. *Cell* 2020;  
6 **181**(2): 271-80 e8.
- 7   3.     Ashraf UM, Abokor AA, Edwards JM, et al. SARS-CoV-2, ACE2 expression, and  
8 systemic organ invasion. *Physiol Genomics* 2021; **53**(2): 51-60.
- 9   4.     Ranard LS, Fried JA, Abdalla M, et al. Approach to Acute Cardiovascular  
10 Complications in COVID-19 Infection. *Circ Heart Fail* 2020; **13**(7): e007220.
- 11  5.     Huang C, Huang L, Wang Y, et al. 6-month consequences of COVID-19 in patients  
12 discharged from hospital: a cohort study. *Lancet* 2021; **397**(10270): 220-32.
- 13  6.     Puntmann VO, Carerj ML, Wieters I, et al. Outcomes of Cardiovascular Magnetic  
14 Resonance Imaging in Patients Recently Recovered From Coronavirus Disease 2019  
15 (COVID-19). *JAMA Cardiology* 2020.
- 16  7.     Clavario P, De Marzo V, Lotti R, et al. Assessment of functional capacity with  
17 cardiopulmonary exercise testing in non-severe COVID-19 patients at three months follow-  
18 up. *medRxiv* 2020.
- 19  8.     Raman B, Cassar MP, Tunnicliffe EM, et al. Medium-term effects of SARS-CoV-2  
20 infection on multiple vital organs, exercise capacity, cognition, quality of life and mental  
21 health, post-hospital discharge. *EClinicalMedicine* 2021; **31**: 100683.
- 22  9.     World Health Organisation. COVID-19 Therapeutic Trial Synopsis 02/08/2020  
23 Accessed Aug 2, 2020. [https://www.who.int/blueprint/priority-diseases/key-action/COVID-](https://www.who.int/blueprint/priority-diseases/key-action/COVID-19_Treatment_Trial_Design_Master_Protocol_synopsis_Final_18022020.pdf)  
24 [19\\_Treatment\\_Trial\\_Design\\_Master\\_Protocol\\_synopsis\\_Final\\_18022020.pdf](https://www.who.int/blueprint/priority-diseases/key-action/COVID-19_Treatment_Trial_Design_Master_Protocol_synopsis_Final_18022020.pdf) (accessed  
25 02/08/2020 2020).
- 26  10.    Prineas RJ, Crow RS, Zhang Z-M. The Minnesota code manual of  
27 electrocardiographic findings : including measurement and comparison with the Novacode ;  
28 standards and procedures for ECG measurement in epidemiologic and clinical trials. 2nd ed. /  
29 Ronald J. Prineas, Richard S. Crow, Zhu-Ming Zhang. ed. London: Springer; 2010.
- 30  11.    Kroenke K, Spitzer RL, Williams JB. The PHQ-15: validity of a new measure for  
31 evaluating the severity of somatic symptoms. *Psychosom Med* 2002; **64**(2): 258-66.

- 32 12. Bestall JC, Paul EA, Garrod R, Garnham R, Jones PW, Wedzicha JA. Usefulness of  
33 the Medical Research Council (MRC) dyspnoea scale as a measure of disability in patients  
34 with chronic obstructive pulmonary disease. *Thorax* 1999; **54**(7): 581-6.
- 35 13. Krupp LB, LaRocca NG, Muir-Nash J, Steinberg AD. The fatigue severity scale.  
36 Application to patients with multiple sclerosis and systemic lupus erythematosus. *Arch*  
37 *Neurol* 1989; **46**(10): 1121-3.
- 38 14. Li K, Fang Y, Li W, et al. CT image visual quantitative evaluation and clinical  
39 classification of coronavirus disease (COVID-19). *Eur Radiol* 2020; **30**(8): 4407-16.
- 40 15. Graham BL, Steenbruggen I, Miller MR, et al. Standardization of Spirometry 2019  
41 Update. An Official American Thoracic Society and European Respiratory Society Technical  
42 Statement. *Am J Respir Crit Care Med* 2019; **200**(8): e70-e88.
- 43 16. Graham BL, Brusasco V, Burgos F, et al. 2017 ERS/ATS standards for single-breath  
44 carbon monoxide uptake in the lung. *Eur Respir J* 2017; **49**(1).
- 45 17. Mezzani A. Cardiopulmonary Exercise Testing: Basics of Methodology and  
46 Measurements. *Ann Am Thorac Soc* 2017; **14**(Supplement\_1): S3-S11.
- 47 18. Organisation WH. COVID-19 Therapeutic Trial Synopsis 02/08/2020 2020.  
48 [https://www.who.int/blueprint/priority-diseases/key-action/COVID-](https://www.who.int/blueprint/priority-diseases/key-action/COVID-19_Treatment_Trial_Design_Master_Protocol_synopsis_Final_18022020.pdf)  
49 [19\\_Treatment\\_Trial\\_Design\\_Master\\_Protocol\\_synopsis\\_Final\\_18022020.pdf](https://www.who.int/blueprint/priority-diseases/key-action/COVID-19_Treatment_Trial_Design_Master_Protocol_synopsis_Final_18022020.pdf) (accessed  
50 02/08/2020 2020).
- 51 19. Seymour CW, Liu VX, Iwashyna TJ, et al. Assessment of Clinical Criteria for Sepsis:  
52 For the Third International Consensus Definitions for Sepsis and Septic Shock (Sepsis-3).  
53 *JAMA* 2016; **315**(8): 762-74.
- 54 20. Ferreira VM, Schulz-Menger J, Holmvang G, et al. Cardiovascular Magnetic  
55 Resonance in Nonischemic Myocardial Inflammation: Expert Recommendations. *J Am Coll*  
56 *Cardiol* 2018; **72**(24): 3158-76.
- 57 21. Levett DZH, Jack S, Swart M, et al. Perioperative cardiopulmonary exercise testing  
58 (CPET): consensus clinical guidelines on indications, organization, conduct, and  
59 physiological interpretation. *Br J Anaesth* 2018; **120**(3): 484-500.
- 60 22. Kotecha T, Knight DS, Razvi Y, et al. Patterns of myocardial injury in recovered  
61 troponin-positive COVID-19 patients assessed by cardiovascular magnetic resonance.  
62 *European Heart Journal* 2021.
- 63 23. Starekova J, Bluemke DA, Bradham WS, et al. Evaluation for Myocarditis in  
64 Competitive Student Athletes Recovering From Coronavirus Disease 2019 With Cardiac  
65 Magnetic Resonance Imaging. *JAMA cardiology* 2021.

- 66 24. Mahmud M, Piechnik SK, Levelt E, et al. Adenosine stress native T1 mapping in  
67 severe aortic stenosis: evidence for a role of the intravascular compartment on myocardial T1  
68 values. *Journal of Cardiovascular Magnetic Resonance* 2014; **16**(1): 1-8.
- 69 25. Huang C, Wang Y, Li X, et al. Clinical features of patients infected with 2019 novel  
70 coronavirus in Wuhan, China. *The lancet* 2020; **395**(10223): 497-506.
- 71 26. Talla A, Vasaiakar SV, Lemos MP, et al. Longitudinal immune dynamics of mild  
72 COVID-19 define signatures of recovery and persistence. *bioRxiv* 2021.
- 73 27. Group P-CC, Evans RA, McAuley H, et al. Physical, cognitive and mental health  
74 impacts of COVID-19 following hospitalisation – a multi-centre prospective cohort study.  
75 *medRxiv* 2021: 2021.03.22.21254057.
- 76 28. Mohr A, Dannerbeck L, Lange TJ, et al. Cardiopulmonary exercise pattern in patients  
77 with persistent dyspnoea after recovery from COVID-19. *Multidisciplinary Respiratory*  
78 *Medicine* 2021; **16**(1).
- 79 29. Ong KC, Ng A-K, Lee L-U, et al. Pulmonary function and exercise capacity in  
80 survivors of severe acute respiratory syndrome. *European Respiratory Journal* 2004; **24**(3):  
81 436-42.
- 82 30. Debeaumont D, Boujibar F, Ferrand-Devouge E, et al. Cardiopulmonary Exercise  
83 Testing to Assess Persistent Symptoms at 6 Months in People With COVID-19 Who  
84 Survived Hospitalization—A Pilot Study. *Physical Therapy* 2021.
- 85 31. Goodman BP, Khoury JA, Blair JE, Grill MF. COVID-19 Dysautonomia. *Front*  
86 *Neurol* 2021; **12**: 624968.
- 87 32. Barizien N, Le Guen M, Russel S, Touche P, Huang F, Vallee A. Clinical  
88 characterization of dysautonomia in long COVID-19 patients. *Sci Rep* 2021; **11**(1): 14042.
- 89 33. Pierpont GL, Voth EJ. Assessing autonomic function by analysis of heart rate  
90 recovery from exercise in healthy subjects. *Am J Cardiol* 2004; **94**(1): 64-8.
- 91 34. Baratto C, Caravita S, Faini A, et al. Impact of COVID-19 on exercise  
92 pathophysiology. A combined cardiopulmonary and echocardiographic exercise study. *J Appl*  
93 *Physiol (1985)* 2021.
- 94 35. Varga Z, Flammer AJ, Steiger P, et al. Endothelial cell infection and endotheliitis in  
95 COVID-19. *The Lancet* 2020; **395**(10234): 1417-8.
- 96 36. Nicolai L, Leunig A, Brambs S, et al. Immunothrombotic dysregulation in COVID-19  
97 pneumonia is associated with respiratory failure and coagulopathy. *Circulation* 2020;  
98 **142**(12): 1176-89.

- 99 37. Carfi A, Bernabei R, Landi F. Persistent symptoms in patients after acute COVID-19.  
100 *Jama* 2020; **324**(6): 603-5.
- 101 38. Sudre CH, Murray B, Varsavsky T, et al. Attributes and predictors of long COVID.  
102 *Nature Medicine* 2021: 1-6.
- 103 39. Davis HE, Assaf GS, McCorkell L, et al. Characterizing Long COVID in an  
104 International Cohort: 7 Months of Symptoms and Their Impact. *medRxiv* 2020.
- 105 40. Nalbandian A, Sehgal K, Gupta A, et al. Post-acute COVID-19 syndrome. *Nat Med*  
106 2021; **27**(4): 601-15.
- 107 41. Amenta EM, Spallone A, Rodriguez-Barradas MC, El Sahly HM, Atmar RL,  
108 Kulkarni PA. Postacute COVID-19: An Overview and Approach to Classification. *Open*  
109 *Forum Infect Dis* 2020; **7**(12): ofaa509.
- 110 42. Cox LS, Bellantuono I, Lord JM, et al. Tackling immunosenescence to improve  
111 COVID-19 outcomes and vaccine response in older adults. *Lancet Healthy Longev* 2020;  
112 **1**(2): e55-e7.
- 113 43. Doykov I, Hallqvist J, Gilmour KC, Grandjean L, Mills K, Heywood WE. 'The long  
114 tail of Covid-19' - The detection of a prolonged inflammatory response after a SARS-CoV-2  
115 infection in asymptomatic and mildly affected patients. *F1000Res* 2020; **9**: 1349.
- 116 44. McFarland AJ, Yousuf MS, Shiers S, Price TJ. Neurobiology of SARS-CoV-2  
117 interactions with the peripheral nervous system: implications for COVID-19 and pain. *Pain*  
118 *Rep* 2021; **6**(1): e885.
- 119 45. Wang EY, Mao T, Klein J, et al. Diverse functional autoantibodies in patients with  
120 COVID-19. *Nature* 2021; **595**(7866): 283-8.

**Table 1. Demographics and baseline characteristics of COVID-19 patients who underwent single assessment, serial assessments (2-3 months & 6 months) and controls.**

|                                        | COVID-19, 2-3m<br>(N=58) | COVID-19, 6m<br>(N=46) | Controls(N=30)     | P-values          |                   |                   |
|----------------------------------------|--------------------------|------------------------|--------------------|-------------------|-------------------|-------------------|
|                                        |                          |                        |                    | 2-3m vs Controls  | 6m vs Controls    | 2-3m vs 6m        |
| <b>General demographics</b>            |                          |                        |                    |                   |                   |                   |
| Age, years                             | 55.4 (13.2)              | 55.2 (13.3)            | 53.9 (12.3)        | 0.62              | 0.67              | 0.96              |
| Gender                                 |                          |                        |                    | 1.00 <sup>a</sup> | 0.81 <sup>a</sup> | 0.69 <sup>a</sup> |
| Female                                 | 24/58 (41.4%)            | 17/46 (37.0%)          | 12/30 (40.0%)      |                   |                   |                   |
| Male                                   | 34/58 (58.6%)            | 29/46 (63.0%)          | 18/30 (60.0%)      |                   |                   |                   |
| BMI, kg/m <sup>2</sup>                 | 30.8 (26.2 - 36.4)       | 30.6 (26.6 - 35.6)     | 27.3 (23.1 - 35.1) | 0.17 <sup>b</sup> | 0.19 <sup>b</sup> | 0.91 <sup>b</sup> |
| Black/Asian and minority ethnic groups | 13/58 (22.4%)            | 10/46 (21.7%)          | 1/30 (3.3 %)       | 0.03 <sup>c</sup> | 0.04 <sup>c</sup> | 1.00 <sup>a</sup> |
| Current/Ex-smoker                      | 20/58 (34.5%)            | 17/46 (37.0%)          | 7/30 (23.3%)       | 0.34 <sup>c</sup> | 0.31 <sup>c</sup> | 0.84 <sup>a</sup> |
| Type 1 Diabetes                        | 1/58 (1.7%)              | 1/46 (2.2%)            | 0/30 (0.0%)        | 1.00 <sup>c</sup> | 1.00 <sup>c</sup> | 1.00 <sup>c</sup> |
| Type 2 Diabetes                        | 8/58 (13.8%)             | 7/46 (15.2%)           | 3/30 (10.0%)       | 0.74 <sup>c</sup> | 0.73 <sup>c</sup> | 1.00 <sup>a</sup> |
| Hypertension                           | 22/58 (37.9%)            | 17/46 (37.0%)          | 9/30 (30.0%)       | 0.49 <sup>c</sup> | 0.62 <sup>c</sup> | 1.00 <sup>a</sup> |
| Coronary artery disease                | 2/58 (3.4%)              | 1/46 (2.2%)            | 0/30 (0.0%)        | 0.55 <sup>c</sup> | 1.00 <sup>c</sup> | 1.00 <sup>c</sup> |
| Cerebrovascular Disease                | 1/58 (1.7%)              | 0/46 (0.0%)            | 0/30 (0.0%)        | 1.00 <sup>c</sup> | 1.00 <sup>c</sup> | 1.00 <sup>c</sup> |
| Asthma                                 | 20/58 (34.5%)            | 17/46 (37.0%)          | 6/30 (20.0%)       | 0.22 <sup>c</sup> | 0.13 <sup>c</sup> | 0.84 <sup>a</sup> |
| COPD                                   | 3/58 (5.2%)              | 2/46 (4.3%)            | 0/30 (0.0%)        | 0.55 <sup>c</sup> | 0.51 <sup>c</sup> | 1.00 <sup>c</sup> |
| Previous cancer                        | 2/58 (3.4%)              | 2/46 (4.3%)            | 3/30 (10.0%)       | 0.33 <sup>c</sup> | 0.38 <sup>c</sup> | 1.00 <sup>c</sup> |
| Depression                             | 3/58 (5.2%)              | 3/46 (6.5%)            | 1/30 (3.3%)        | 1.00 <sup>c</sup> | 1.00 <sup>c</sup> | 1.00 <sup>c</sup> |
| <b>Admission details</b>               |                          |                        |                    |                   |                   |                   |
| Median length of stay, days            | 8.5 (5.0 - 17.0)         | 9.0 (5.0 - 17.5)       | ..                 | ..                | ..                | 0.85 <sup>b</sup> |

|                                                     |               |               |    |    |    |                   |
|-----------------------------------------------------|---------------|---------------|----|----|----|-------------------|
| Readmitted                                          | 10/58 (17.2%) | 9/46 (19.6%)  | .. | .. | .. | 0.48 <sup>a</sup> |
| Required ITU admission                              | 21/58 (36.2%) | 17/46 (37.0%) | .. | .. | .. | 0.55 <sup>a</sup> |
| <b>qSOFA</b>                                        |               |               |    |    |    |                   |
| 0                                                   | 17/58 (29.3%) | 15/46 (32.6%) | .. | .. | .. | 0.94 <sup>d</sup> |
| 1                                                   | 38/58 (65.5%) | 29/46 (63.0%) | .. | .. | .. |                   |
| 2                                                   | 3/58 (5.2%)   | 2/46 (4.3%)   | .. | .. | .. |                   |
| 3                                                   | 0/58 (0.0%)   | 0/46          | .. | .. | .. |                   |
| <b>Ordinal scale for clinical improvement (WHO)</b> |               |               |    |    |    |                   |
| 1                                                   | 0/58 (0.0%)   | 0/46          | .. | .. | .. | 1.00 <sup>d</sup> |
| 2                                                   | 4/58 (6.9%)   | 3/46 (6.5%)   | .. | .. | .. |                   |
| 3                                                   | 22/58 (37.9%) | 16/46 (34.8%) | .. | .. | .. |                   |
| 4                                                   | 5/58 (8.6%)   | 4/46 (8.7%)   | .. | .. | .. |                   |
| 5                                                   | 15/58 (25.9%) | 12/46 (26.1%) | .. | .. | .. |                   |
| 6                                                   | 7/58 (12.1%)  | 6/46 (13.0%)  | .. | .. | .. |                   |
| 7                                                   | 5/58 (8.6%)   | 5/46 (10.9%)  | .. | .. | .. |                   |
| <b>Signs and symptoms on admission</b>              |               |               |    |    |    |                   |
| Fever                                               | 51/58 (87.9%) | 40/46 (87.0%) | .. | .. | .. | 0.56 <sup>a</sup> |
| Malaise                                             | 51/58 (87.9%) | 41/46 (89.1%) | .. | .. | .. | 0.55 <sup>a</sup> |
| Shortness of breath                                 | 51/58 (87.9%) | 41/46 (89.1%) | .. | .. | .. | 0.55 <sup>a</sup> |
| Cough                                               | 35/58 (60.3%) | 26/46 (56.5%) | .. | .. | .. | 0.42 <sup>a</sup> |
| Dysgeusia                                           | 29/58 (50.0%) | 21/46 (45.7%) | .. | .. | .. | 0.70 <sup>a</sup> |
| Anosmia                                             | 26/58 (44.8%) | 20/46 (43.5%) | .. | .. | .. | 1.00 <sup>a</sup> |
| Diarrhoea                                           | 17/58 (29.3%) | 13/46 (28.3%) | .. | .. | .. | 1.00 <sup>a</sup> |
| Chest pain                                          | 16/58 (27.6%) | 13/46 (28.3%) | .. | .. | .. | 1.00 <sup>a</sup> |
| Headache                                            | 13/58 (22.4%) | 12/46 (26.0%) | .. | .. | .. | 0.82 <sup>a</sup> |
| Vomiting                                            | 9/58 (15.5%)  | 6/46 (13.0%)  | .. | .. | .. | 0.79 <sup>a</sup> |



| <b>Treatment</b>                  |               |               |    |    |    |    |                   |
|-----------------------------------|---------------|---------------|----|----|----|----|-------------------|
| Oxygen replacement                | 54/58 (93.1%) | 43/46 (93.5%) | .. | .. | .. | .. | 1.00 <sup>c</sup> |
| Nasal cannula                     | 14/58 (24.1%) | 10/46 (21.7%) | .. | .. | .. | .. | 1.00 <sup>d</sup> |
| Simple face mask                  | 7/58 (12.1%)  | 5/46 (10.8%)  | .. | .. | .. | .. |                   |
| Venturi face mask                 | 6/58 (10.3%)  | 5/46 (10.8%)  | .. | .. | .. | .. |                   |
| High flow oxygen delivery         | 7/58 (12.1%)  | 5/46 (10.8%)  | .. | .. | .. | .. |                   |
| CPAP                              | 8/58 (13.8%)  | 7/46 (15.2%)  | .. | .. | .. | .. |                   |
| Intubation                        | 12/58 (20.7%) | 11/46 (23.9%) | .. | .. | .. | .. |                   |
| ECMO                              | 0/58 (0%)     | 0/46          | .. | .. | .. | .. |                   |
| Inotropic support                 | 4/58 (6.9%)   | 4/46 (8.7%)   | .. | .. | .. | .. | 0.73 <sup>c</sup> |
| Renal replacement therapy         | 2/58 (3.4%)   | 2/46 (4.3%)   | .. | .. | .. | .. | 1.00 <sup>c</sup> |
| Antibiotics                       | 57/58 (98.3%) | 45/46 (97.8%) | .. | .. | .. | .. | 1.00 <sup>c</sup> |
| Antivirals                        | 4/58 (6.9%)   | 2/46 (4.3%)   | .. | .. | .. | .. | 0.69 <sup>c</sup> |
| Steroids                          | 16/58 (27.6%) | 14/46 (30.4%) | .. | .. | .. | .. | 0.83 <sup>a</sup> |
| <b>Acute organ injury</b>         |               |               |    |    |    |    |                   |
| Acute liver injury <sup>e</sup>   | 18/58 (31.0%) | 18/46 (39.1%) | .. | .. | .. | .. | 0.41 <sup>a</sup> |
| Acute kidney injury <sup>f</sup>  | 6/58 (10.3%)  | 6/46 (13.0%)  | .. | .. | .. | .. | 0.76 <sup>a</sup> |
| Acute cardiac injury <sup>g</sup> | 3/58 (5.2%)   | 0/46          | .. | .. | .. | .. | 0.25 <sup>c</sup> |
| Pulmonary embolism                | 7/58 (12.1%)  | 6/46 (13.0%)  | .. | .. | .. | .. | 1.00 <sup>a</sup> |
| Central                           | 1/58 (1.7%)   | 0/46          | .. | .. | .. | .. | 1.00 <sup>c</sup> |
| Peripheral                        | 6/58 (10.3%)  | 6/46 (13.0%)  | .. | .. | .. | .. | 0.76 <sup>a</sup> |

Data are mean (SD), median (IQR) and n/N (%), where N is the total number of participants with available data. P-values from independent Student's t-test, Chi-square (a), Mann-Whitney U test (b), Fisher's exact test (c), or Fisher-Freeman-Halton exact test (d), with bold values highlighting statistical significance. 2-3m = Two to three months. 6m = Six months. COPD = Chronic obstructive pulmonary disease. ITU = Intensive treatment unit. qSOFA = Quick sequential organ failure assessment. CPAP = Continuous positive airway pressure. ECMO = Extracorporeal membrane oxygenation. WHO = World health organization. e defined as blood levels of alanine aminotransferase (ALT) or aspartate aminotransferase (AST) above 3x the upper reference limit (>135 IU/L or >126 IU/L, respectively), alkaline phosphatase or gamma-glutamyltransferase above 2x the upper reference limit (>260 IU/L or >80 IU/L, respectively). f defined as an increase in serum creatinine of at least 26 umol/L within 48 hours, or 1.5 to 2-fold increase from baseline. g defined as an acute rise in hypersensitive troponin I above the 99th percentile upper reference limit (>34 ng/L). Control subjects were matched for co-morbidities as closely as possible.

**Table 2. Blood test results and symptom prevalence for patients with COVID-19 and controls.**

|                                        | COVID-19<br>(admission) (N=58) | COVID-19, 2-3m<br>(N=58) | COVID-19, 6m<br>(N=46) | Control group (N=30)   | P-values            |                    |                           |
|----------------------------------------|--------------------------------|--------------------------|------------------------|------------------------|---------------------|--------------------|---------------------------|
|                                        |                                |                          |                        |                        | 2-3m vs<br>Controls | 6m vs<br>Controls  | 2-3m<br>vs 6m             |
| <b>Haematology and Coagulation</b>     |                                |                          |                        |                        |                     |                    |                           |
| White cell count, x10 <sup>9</sup> / L | 6.5 (5.0 - 8.1)                | 6.5 (1.8)                | 6.4 (2.1)              | 6.7 (1.6)              | 0.72                | 0.24 <sup>a</sup>  | 0.072 <sup>b</sup>        |
| <4                                     | 6/58 (10.3%)                   | 5/57 (8.8%)              | 5/46 (10.9%)           | 0/30 (0.0%)            | 0.16 <sup>c</sup>   | 0.054 <sup>d</sup> | 0.73 <sup>e</sup>         |
| 4-11                                   | 45/58 (77.6%)                  | 52/57 (91.2%)            | 39/46 (84.8%)          | 30/30 (100%)           |                     |                    |                           |
| >11                                    | 7/58 (12.1%)                   | 0/57 (0.0%)              | 2/46 (4.3%)            | 0/30 (0.0%)            |                     |                    |                           |
| Neutrophil count, x10 <sup>9</sup> / L | 5.2 (3.5 - 6.6)                | 3.6 (2.9 - 4.6)          | 3.4 (2.8 - 4.5)        | 3.9 (2.8 - 4.3)        | 0.65 <sup>a</sup>   | 0.50 <sup>a</sup>  | 0.70 <sup>b</sup>         |
| Lymphocyte count, x10 <sup>9</sup> / L | 0.9 (0.7 - 1.3)                | 1.8 (1.6 - 2.3)          | 1.7 (1.4 - 2)          | 1.9 (1.6 - 2.5)        | 0.91 <sup>a</sup>   | <b>0.016</b>       | <b>0.002<sup>b</sup></b>  |
| <1.0                                   | 27/58 (46.6%)                  | 0/57 (0.0%)              | 0/46 (0.0%)            | 0/30 (0.0%)            |                     |                    |                           |
| Haemoglobin, g/L                       | 141.0 (125.5 - 150.5)          | 135.4 (13.2)             | 140.2 (14.7)           | 139.0 (14.4)           | 0.25                | 0.65               | <b>0.008<sup>f</sup></b>  |
| <120 (women)/<130 (men)                | 12/58 (20.6%)                  | 8/57 (14.0%)             | 5/46 (10.9%)           | 4/30 (13.3%)           | 1.00 <sup>c</sup>   | 0.73 <sup>c</sup>  | 1.00 <sup>g</sup>         |
| Platelet count, x10 <sup>9</sup> / L   | 207.5 (168.8 - 259.5)          | 261.0 (213.5 - 285.5)    | 243.5 (213.0 - 267.3)  | 269.0 (220.0 - 292.0)  | 0.63 <sup>a</sup>   | 0.24               | <b>0.0002<sup>b</sup></b> |
| <100                                   | 1/58 (1.7%)                    | 0/57 (0.0%)              | 0/46 (0.0%)            | 0/30 (0.0%)            |                     |                    |                           |
| D-dimer, mg/L                          | 780.0 (636.0 - 1490.0)         | 418.0 (253.8 - 829.3)    | 390.0 (255.0 - 625.0)  | 337.0 (227.0 - 498.75) | 0.054 <sup>a</sup>  | 0.23 <sup>a</sup>  | <b>0.003<sup>b</sup></b>  |
| <b>Hepatic panel</b>                   |                                |                          |                        |                        |                     |                    |                           |
| Total bilirubin, mmol/L                | 10.0 (7.0 - 13.8)              | 10.0 (6.8 - 14.0)        | 10.5 (7.0 - 14.3)      | 8.0 (7.0 - 11.5)       | 0.51 <sup>a</sup>   | 0.17 <sup>a</sup>  | 0.17 <sup>b</sup>         |
| ALT, IU/L                              | 34.0 (22.3 - 62.8)             | 23.5 (18.8 - 39.0)       | 24.0 (18.8 - 37.0)     | 23.5 (16.0 - 28.0)     | 0.19 <sup>a</sup>   | 0.20 <sup>a</sup>  | 0.63 <sup>b</sup>         |
| >135 IU/L (>3xULN)                     | 4/56 (7.1%)                    | 1/58 (1.7%)              | 0/46 (0.0%)            | 0/30 (0.0%)            |                     |                    |                           |
| Alk Phos, IU/L                         | ..                             | 72.0 (60.0 - 85.5)       | 69.0 (54.8 - 83.0)     | 65.5 (55.8 - 80.3)     | 0.21 <sup>a</sup>   | 0.46 <sup>a</sup>  | 0.20 <sup>b</sup>         |
| >260 IU/L (>2xULN)                     | ..                             | 0/58 (0.0%)              | 0/46 (0.0%)            | 0/30 (0.0%)            |                     |                    |                           |
| AST, IU/L                              | ..                             | 23.0 (18.0 - 28.0)       | 21.0 (18.0 - 26.0)     | 21.0 (18.0 - 27.0)     | 0.36 <sup>a</sup>   | 0.87 <sup>a</sup>  | 0.07 <sup>b</sup>         |
| >126 IU/L (>3xULN)                     | ..                             | 0/55 (0.0%)              | 0/46 (0.0%)            | 0/25 (0.0%)            |                     |                    |                           |

|                                        |                      |                       |                       |                       |                    |                    |                          |
|----------------------------------------|----------------------|-----------------------|-----------------------|-----------------------|--------------------|--------------------|--------------------------|
| GGT, IU/L                              | ..                   | 33.0 (21.8 - 52.3)    | 30.5 (22.0 - 42.3)    | 29.0 (18.5 - 47.5)    | 0.25 <sup>a</sup>  | 0.74 <sup>a</sup>  | <b>0.002<sup>b</sup></b> |
| >80 IU/L (>2xULN)                      | ..                   | 6/54 (11.1%)          | 1/46 (4.0%)           | 1/25 (4%)             | 0.42 <sup>c</sup>  |                    |                          |
| <b>Renal function and electrolytes</b> |                      |                       |                       |                       |                    |                    |                          |
| Potassium, mmol/L                      | 3.8 (3.7 - 4.1)      | 3.9 (0.3)             | 3.9 (0.3)             | 3.9 (0.3)             | 0.92               | 0.23               | 0.55 <sup>f</sup>        |
| Sodium, mmol/L                         | 136.0 (2.9)          | 141.0 (139.0 - 141.3) | 141.0 (139.0 - 142.0) | 140.0 (139.0 - 141.0) | 0.12 <sup>a</sup>  | 0.050 <sup>a</sup> | 0.11 <sup>b</sup>        |
| Creatinine, umol/L                     | 75.5 (69.0 - 91.0)   | 69.5 (60.0 - 79.3)    | 74.5 (64.8 - 86.0)    | 79.0 (63.0 - 89.0)    | 0.16 <sup>a</sup>  | 0.64 <sup>a</sup>  | <b>0.012<sup>b</sup></b> |
| ≤133                                   | 55/58 (94.8%)        | 57/58 (98.3%)         | 44/46 (95.7%)         | 30/30 (100%)          |                    |                    |                          |
| >133                                   | 3/58 (5.2%)          | 1/58 (1.7%)           | 2/46 (4.3%)           | 0/30 (0%)             |                    |                    |                          |
| eGFR, ml/min/1.73m <sup>2</sup>        |                      |                       |                       |                       |                    |                    |                          |
| ≥90                                    | 31/58 (53.4%)        | 38/58 (65.5%)         | 26/46 (56.5%)         | 17/30 (56.7%)         | 0.53 <sup>d</sup>  | 0.74 <sup>d</sup>  | 0.22 <sup>e</sup>        |
| 60-89                                  | 21/58 (36.2%)        | 17/58 (29.3%)         | 18/46 (39.1%)         | 13/30 (43.3%)         |                    |                    |                          |
| 45-59                                  | 3/58 (5.2%)          | 1/58 (1.7%)           | 0/46 (0.0%)           | 0/30 (0.0%)           |                    |                    |                          |
| 30-44                                  | 2/58 (3.4%)          | 2/58 (3.4%)           | 2/46 (3.4%)           | 0/30 (0.0%)           |                    |                    |                          |
| 15-29                                  | 1/58 (1.7%)          | 0/58 (0.0%)           | 0/46 (0.0%)           | 0/30 (0.0%)           |                    |                    |                          |
| <15                                    | 0/58 (0.0%)          | 0/58 (0.0%)           | 0/46 (0.0%)           | 0/30 (0.0%)           |                    |                    |                          |
| <b>Inflammatory markers</b>            |                      |                       |                       |                       |                    |                    |                          |
| C-reactive protein, mg/L               | 119.1 (75.9 - 185.5) | 2.0 (0.9 - 5.0)       | 1.7 (0.9 - 5.6)       | 1.2 (0.7 - 2.6)       | 0.058 <sup>a</sup> | 0.23 <sup>a</sup>  | 0.98 <sup>b</sup>        |
| >10                                    | 58/58 (100%)         | 4/58 (6.9%)           | 6/46 (13.0%)          | 0/30 (0.0%)           | 0.29 <sup>c</sup>  | 0.076 <sup>c</sup> | 0.45 <sup>g</sup>        |
| Procalcitonin, ug/L                    | ..                   | 0.020 (0.020 - 0.040) | 0.020 (0.010 - 0.030) | 0.02 (0.020 - 0.030)  | 0.80 <sup>a</sup>  | 0.22 <sup>a</sup>  | 0.083 <sup>b</sup>       |
| <b>Heart failure, cardiac injury</b>   |                      |                       |                       |                       |                    |                    |                          |
| NT-proBNP, ng/L                        | ..                   | 56.8 (32.3 - 113.6)   | 56.3 (31.2 - 98.3)    | 48.1 (23.0 - 88.4)    | 0.22 <sup>a</sup>  | 0.50 <sup>a</sup>  | 0.20 <sup>b</sup>        |
| ≥125                                   |                      | 11/56 (19.6%)         | 8/46 (17.4%)          | 3/28 (10.7%)          | 0.37 <sup>c</sup>  | 0.52 <sup>c</sup>  | 0.75 <sup>g</sup>        |
| Troponin I, ng/L                       | ..                   | 2.0 (2.0 - 3.0)       | 2.0 (2.0 - 4.0)       | 2.0 (2.0 - 3.0)       | 0.49 <sup>a</sup>  | 0.27 <sup>a</sup>  | 0.14 <sup>b</sup>        |
| >34                                    |                      | 0/58 (0.0%)           | 0/46 (0.0%)           | 0/27 (0.0%)           |                    |                    |                          |

Data are median (IQR) for non-parametric data and mean (SD) for parametric data, and n/N (%), where N is the total number of participants with available data. *P*-values comparing COVID-19 groups (post-discharge) and control group are from independent t-test, Mann-Whitney U test <sup>(a)</sup>, Wilcoxon Signed Ranks test <sup>(b)</sup>, Fisher's exact test <sup>(c)</sup>, Fisher-Freeman-Halton exact test <sup>(d)</sup>, Stuart Maxwell test <sup>(e)</sup>, paired t-test <sup>(f)</sup> or McNemar <sup>(\*\*)</sup> test, with bold values highlighting statistical significance. 2-3m = Two to three months. 6m = Six months. ALT = Alanine aminotransferase. Alk Phos = Alkaline phosphatase. AST = Aspartate aminotransferase. GGT = Gamma-glutamyl transferase. eGFR = Estimated Glomerular Filtration Rate. CRP = C-reactive protein. NT-proBNP = N-terminal pro-brain natriuretic peptide.

**Table 3. Symptom prevalence, Fatigue Severity Score and MRC dyspnoea scale in patients at follow-up and controls.**

|                                                             | COVID-19, 2-3m   | COVID-19, 6m      | Controls         | <i>P</i> -values               |                                |                                |
|-------------------------------------------------------------|------------------|-------------------|------------------|--------------------------------|--------------------------------|--------------------------------|
|                                                             |                  |                   |                  | 2-3m vs Controls               | 6m vs Controls                 | 2-3m vs 6m                     |
| <b>Symptoms at follow-up</b>                                |                  |                   |                  |                                |                                |                                |
| Stomach Pain                                                | 12/57 (21.1%)    | 12/46 (26.1%)     | 5/30 (16.7%)     | 0.78 <sup>a</sup>              | 0.41 <sup>a</sup>              | 1.00 <sup>b</sup>              |
| Back Pain                                                   | 38/57 (66.7%)    | 24/46 (52.2%)     | 11/30 (36.7%)    | <b>0.012</b> <sup>a</sup>      | 0.24 <sup>a</sup>              | 0.33 <sup>b</sup>              |
| Pain in the arms, legs or joints                            | 45/57 (78.9%)    | 27/46 (58.7%)     | 17/30 (56.7%)    | <b>0.045</b> <sup>a</sup>      | 1.00 <sup>a</sup>              | 0.077 <sup>b</sup>             |
| Feeling tired or too little energy                          | 49/57 (86.0%)    | 28/46 (60.9%)     | 16/30 (53.3%)    | <b>0.002</b> <sup>a</sup>      | 0.64 <sup>a</sup>              | <b>0.004</b> <sup>b</sup>      |
| Trouble falling asleep or sleeping too much                 | 42/57 (73.7%)    | 29/46 (63.0%)     | 16/30 (53.3%)    | 0.093 <sup>a</sup>             | 0.48 <sup>a</sup>              | 0.29 <sup>b</sup>              |
| Headaches                                                   | 24/57 (42.1%)    | 16/46 (34.8%)     | 13/30 (43.3%)    | 1.00 <sup>a</sup>              | 0.48 <sup>a</sup>              | 0.63 <sup>b</sup>              |
| Constipation or diarrhoea                                   | 17/57 (29.8%)    | 12/46 (26.1%)     | 6/30 (20.0%)     | 0.44 <sup>a</sup>              | 0.59 <sup>a</sup>              | 1.00 <sup>b</sup>              |
| Chest pain                                                  | 18/57 (31.6%)    | 8/46 (17.4%)      | 1/30 (3.3%)      | <b>0.002</b> <sup>c</sup>      | 0.079 <sup>c</sup>             | 0.11 <sup>b</sup>              |
| Dizziness                                                   | 19/57 (33.3%)    | 13/46 (28.3%)     | 5/30 (16.7%)     | 0.13 <sup>a</sup>              | 0.283 <sup>a</sup>             | 1.00 <sup>b</sup>              |
| Syncope                                                     | 5/57 (8.8%)      | 1/46 (2.2%)       | 1/30 (3.3%)      | 0.66 <sup>c</sup>              | 1.00 <sup>c</sup>              | 0.13 <sup>b</sup>              |
| Palpitations                                                | 23/57 (40.4%)    | 13/46 (28.3%)     | 6/30 (20.0%)     | 0.093 <sup>a</sup>             | 0.59 <sup>a</sup>              | 0.092 <sup>b</sup>             |
| Shortness of breath                                         | 45/57 (78.9%)    | 20/46 (43.5%)     | 3/30 (10.0%)     | <b>&lt;0.0001</b> <sup>c</sup> | <b>0.002</b> <sup>c</sup>      | <b>&lt;0.0001</b> <sup>b</sup> |
| Any of the above                                            | 56/57 (98.2%)    | 41/46 (89.1%)     | 26/30 (86.7%)    | <b>0.031</b> <sup>c</sup>      | 0.73 <sup>c</sup>              | 0.063 <sup>b</sup>             |
| Presence of cardiopulmonary symptoms                        | 47/57 (82.5%)    | 24/46(52.5%)      | 10/30 (33.3%)    | <b>&lt;0.001</b> <sup>c</sup>  | 0.16 <sup>c</sup>              | <b>0.0001</b> <sup>b</sup>     |
| <b>Fatigue Severity Scale<sup>12</sup></b>                  |                  |                   |                  |                                |                                |                                |
| Median (IQR)                                                | 34.0 (18.0-49.0) | 29.0 (14.0- 44.5) | 17.0 (11.0-24.0) | <b>0.001</b> <sup>d</sup>      | <b>0.035</b> <sup>d</sup>      | <b>0.001</b> <sup>e</sup>      |
| Mean FSS $\geq$ 4                                           | 30/55 (54.5%)    | 20/45 (44.4%)     | 5/29 (17.2%)     | <b>0.001</b> <sup>c</sup>      | <b>0.023</b> <sup>c</sup>      | 0.34 <sup>b</sup>              |
| <b>Medical Research Council Dyspnoea Scale<sup>11</sup></b> |                  |                   |                  |                                |                                |                                |
| MRC grade 2 - 5                                             | 36/56 (64.3%)    | 26/46 (56.5%)     | 3/29 (10.3%)     | <b>&lt;0.0001</b> <sup>c</sup> | <b>&lt;0.0001</b> <sup>c</sup> | 0.42 <sup>b</sup>              |

Data are n/N (%), where N is the total number of participants with available data. *P*-values are from Chi-square <sup>(a)</sup>, McNemar <sup>(b)</sup> test, Fisher's exact test <sup>(c)</sup>, Mann-Whitney U test <sup>(d)</sup> or Wilcoxon Signed Ranks test <sup>(e)</sup>, with bold values highlighting statistical significance. Cardiopulmonary symptoms defined as any of chest pain, dizziness, syncope, palpitations or shortness of breath. 2-3m = Two to three months. 6m = Six months. MRC = Medical research council. FSS = Fatigue severity scale.

**Table 4. Cardiopulmonary MRI parameters in patients and controls.**

|                                                    | COVID-19, 2-3m        | COVID-19, 6m          | Controls              | P-values                  |                      |                           |
|----------------------------------------------------|-----------------------|-----------------------|-----------------------|---------------------------|----------------------|---------------------------|
|                                                    |                       |                       |                       | 2-3m vs Controls          | 6m vs Controls       | 2-3m vs 6m                |
| <b>Lung MRI</b>                                    |                       |                       |                       |                           |                      |                           |
| Lung parenchymal abnormalities, %                  | 32/53 (60.4%)         | 30/44 (68.5%)         | 3/28 (10.7%)          | <0.0001 <sup>a</sup>      | <0.0001 <sup>a</sup> | 0.344 <sup>b</sup>        |
| 0%                                                 | 21/53 (39.6%)         | 14/44 (31.8%)         | 25/28 (89.3%)         | <b>0.0003<sup>c</sup></b> | <0.0001 <sup>c</sup> | 0.005 <sup>d</sup>        |
| 1-25%                                              | 3/53 (5.7%)           | 21/44 (47.7%)         | 0/28 (0.0%)           |                           |                      |                           |
| 26 - 50%                                           | 8/53 (15.1%)          | 5/44 (11.4%)          | 2/28(7.1%)            |                           |                      |                           |
| 51 - 75%                                           | 9/53 (17.0%)          | 4/44 (9.1%)           | 0/28 (0.0%)           |                           |                      |                           |
| >75%                                               | 12/53 (22.6%)         | 0/44 (0.0%)           | 1/28 (3.6%)           |                           |                      |                           |
| <b>Cardiac MRI</b>                                 |                       |                       |                       |                           |                      |                           |
| <b>Left ventricular cine analysis</b>              |                       |                       |                       |                           |                      |                           |
| End-diastolic volume, mls                          | 143.8 (127.3 - 165.9) | 151.1 (125.0 - 183.4) | 153.3 (124.5 - 178.5) | 0.59 <sup>e</sup>         | 0.78                 | 0.21 <sup>f</sup>         |
| End-diastolic volume (indexed), mls/m <sup>2</sup> | 73.3 (64.5 - 83.5)    | 76.7 (66.4 - 86.6)    | 75.6 (63.4 - 87.5)    | 0.51 <sup>e</sup>         | 0.90                 | 0.59 <sup>f</sup>         |
| End-systolic volume, mls                           | 53.1 (41.5 - 71.7)    | 54.6 (44.3 - 71.0)    | 53.1 (47.7 - 70.3)    | 0.81 <sup>e</sup>         | 0.90 <sup>e</sup>    | 0.31 <sup>f</sup>         |
| Mass (diastole), g                                 | 116.1 (100.1 - 135.1) | 119.5 (98.8 - 134.0)  | 107.3 (84.3 - 138.3)  | 0.39 <sup>e</sup>         | 0.25                 | 0.25 <sup>f</sup>         |
| Mass (indexed), g/m <sup>2</sup>                   | 58.9 (49.8 - 66.2)    | 57.0 (50.2 - 65.2)    | 53.8 (48.6 - 63.6)    | 0.21 <sup>e</sup>         | 0.37 <sup>e</sup>    | 0.15 <sup>f</sup>         |
| Stroke volume, mls                                 | 89.6 (79.5 - 104.7)   | 94.2 (80.5 - 109.1)   | 95.0 (78.4 - 116.5)   | 0.59 <sup>e</sup>         | 1.00                 | 0.058 <sup>g</sup>        |
| Ejection fraction, %                               | 63.0 (7.7)            | 62.7 (6.8)            | 63.6 (6.32)           | 0.70                      | 0.58                 | 0.27 <sup>g</sup>         |
| <b>Right ventricular cine analysis</b>             |                       |                       |                       |                           |                      |                           |
| End-diastolic volume, mls                          | 164.4 (36.6)          | 160.1 (40.4)          | 169.3 (46.5)          | 0.61                      | 0.38                 | <b>0.023<sup>g</sup></b>  |
| End-diastolic volume (indexed), mls/m <sup>2</sup> | 81.8 (14.0)           | 78.8 (15.8)           | 84.3 (18.5)           | 0.51                      | 0.18                 | <b>0.005<sup>g</sup></b>  |
| End-systolic volume, mls                           | 70.4 (23.6)           | 65.1 (23.0)           | 72.7 (24.2)           | 0.69                      | 0.19                 | <b>0.0001<sup>g</sup></b> |
| Mass, g                                            | 28.8 (25.8 - 35.5)    | 32.6 (28.8 - 39.8)    | 33.2 (23.7 - 41.8)    | 0.26 <sup>e</sup>         | 0.88 <sup>e</sup>    | 0.13 <sup>f</sup>         |

|                                                     |                    |                    |                    |                          |                   |                               |
|-----------------------------------------------------|--------------------|--------------------|--------------------|--------------------------|-------------------|-------------------------------|
| Mass (indexed), g/m <sup>2</sup>                    | 14.4 (12.6 - 17.2) | 16.4 (14.4 - 19.1) | 16.7 (13.9 - 19.3) | 0.19 <sup>e</sup>        | 0.90 <sup>e</sup> | 0.31 <sup>f</sup>             |
| Stroke volume, mls                                  | 94.0 (19.3)        | 95.1 (20.9)        | 96.6 (25.6)        | 0.61                     | 0.78              | 0.68 <sup>g</sup>             |
| Ejection fraction, %                                | 57.9 (7.8)         | 60.2 (6.2)         | 57.6 (6.0)         | 0.85                     | 0.085             | <b>0.0003</b>                 |
| <b>T<sub>1</sub> and T<sub>2</sub> map analysis</b> |                    |                    |                    |                          |                   |                               |
| Native T <sub>1</sub> (basal myocardium), ms        | 1179.7 (34.4)      | 1152.6 (37.3)      | 1149.3 (24)        | <b>0.0001</b>            | 0.65              | <b>&lt;0.0001<sup>g</sup></b> |
| >1197 ms (>2SD from control mean)                   | 13/50 (26.0%)      | 4/44 (9.1%)        | 1/28 (3.7%)        | <b>0.015<sup>a</sup></b> | 0.64 <sup>a</sup> | 0.065 <sup>b</sup>            |
| Native T <sub>1</sub> (mid myocardium), ms          | 1173.1 (33.6)      | 1145.6 (41.2)      | 1150.2 (32.4)      | <b>0.004</b>             | 0.62              | <b>&lt;0.0001<sup>g</sup></b> |
| >1215 ms (>2SD from control mean)                   | 4/51 (7.8%)        | 1/43 (2.3%)        | 0/28 (0%)          | 0.29 <sup>a</sup>        | 1.00 <sup>a</sup> | 0.38 <sup>b</sup>             |
| Native T <sub>1</sub> (apical myocardium), ms       | 1177.4 (44.7)      | 1153.8 (45.5)      | 1168.3 (53.2)      | 0.42                     | 0.22              | <b>0.001<sup>g</sup></b>      |
| >1275 ms (>2SD from control mean)                   | 1/50 (2.0%)        | 1/43 (2.3%)        | 1/28 (3.6%)        | 1.00 <sup>a</sup>        | 1.00 <sup>a</sup> | 1.00 <sup>b</sup>             |
| ECV (basal myocardium), %                           | 30.4 (28.3 - 31.3) | 27.4 (25.9 - 30.0) | 28.3 (26.8 - 31.5) | 0.12                     | 0.19 <sup>e</sup> | <b>0.001<sup>f</sup></b>      |
| >34.52% (>2SD from control mean)                    | 1/35 (2.9%)        | 2/36 (5.6%)        | 0/21 (0.0%)        | 1.00 <sup>a</sup>        | 0.53 <sup>a</sup> | 1.00 <sup>b</sup>             |
| ECV (mid myocardium), %                             | 30.1 (27.2 - 31.4) | 27.8 (26.1 - 30.8) | 29.4 (27.1 - 30.7) | 0.41 <sup>e</sup>        | 0.35              | <b>0.030<sup>f</sup></b>      |
| >35.87% (>2SD from control mean)                    | 0/37 (0.0%)        | 0/42 (0.0%)        | 1/23 (4.3%)        | 0.38 <sup>a</sup>        | 0.35 <sup>a</sup> |                               |
| ECV (apical myocardium), %                          | 28.7 (27.0 - 31.6) | 28.8 (27.0 - 30.5) | 29.7 (27.2 - 31.5) | 0.51 <sup>e</sup>        | 0.24 <sup>e</sup> | 0.32 <sup>g</sup>             |
| >37.87% (>2SD from control mean)                    | 1/40 (2.5%)        | 0/36 (0.0%)        | 1/23 (4.3%)        | 1.00 <sup>a</sup>        | 0.39 <sup>a</sup> | 1.00 <sup>b</sup>             |
| T <sub>2</sub> (basal myocardium), ms               | 41.7 (2.2)         | 41.4 (2.1)         | 41.6 (2.2)         | 0.80                     | 0.80              | 0.71 <sup>g</sup>             |
| >46 ms (>2SD from control mean)                     | 3/50 (6.0%)        | 1/43 (2.3%)        | 1/28 (3.6%)        | 1.00 <sup>a</sup>        | 1.00 <sup>a</sup> | 1.00 <sup>b</sup>             |
| T <sub>2</sub> (mid myocardium), ms                 | 41.8 (2.2)         | 41.4 (1.8)         | 41.1 (2.3)         | 0.21                     | 0.53              | 0.50 <sup>g</sup>             |
| >46 ms (>2SD from control mean)                     | 1/50 (2.0%)        | 1/42 (2.4%)        | 1/28 (3.6%)        | 1.00 <sup>a</sup>        | 1.00 <sup>a</sup> | 1.00 <sup>b</sup>             |
| T <sub>2</sub> (apical myocardium), ms              | 43.5 (3.0)         | 42.9 (2.4)         | 43.7 (3.5)         | 0.81 <sup>e</sup>        | 0.33              | 0.51 <sup>f</sup>             |
| >51ms (>2SD from control mean)                      | 1/50 (2.0%)        | 0/43 (0.0%)        | 1/28 (3.6%)        | 1.00 <sup>a</sup>        | 0.39 <sup>a</sup> | 1.00 <sup>b</sup>             |
| <b>Late gadolinium enhancement analysis</b>         |                    |                    |                    |                          |                   |                               |
| % LGE volume enhancement                            | 0.8 (0.5 - 1.9)    | 0.7 (0.1 - 2.2)    | 0.6 (0.3 - 1)      | <b>0.023<sup>e</sup></b> | 0.62 <sup>e</sup> | 0.91 <sup>f</sup>             |



|                            |              |              |             |
|----------------------------|--------------|--------------|-------------|
| Myocarditis pattern        | 6/52 (11.5%) | 5/43 (11.6%) | 2/28 (7.4%) |
| Myocardial infarction      | 1/52 (1.9%)  | 0/43 (0.0%)  | 0/28 (0.0%) |
| LV/RV insertion point      | 7/52 (13.5%) | 5/43 (11.6%) | 1/28 (3.7%) |
| Mixed                      | 0/52 (0.0%)  | 0/43 (0.0%)  | 0/28 (0.0%) |
| Other                      | 0/52 (0.0%)  | 0/43 (0.0%)  | 0/28 (0.0%) |
| Pericardial effusion >10mm | 1/52 (1.9%)  | 0/43 (0.0%)  | 0/52 (0.0%) |

Data are median (IQR) for non-parametric data and mean (SD) for parametric data, and n/N (%), where N is the total number of participants with available data. *P*-values are from independent t-test, Fisher's exact test <sup>(a)</sup>, McNemar <sup>(b)</sup> test, Fisher-Freeman-Halton exact test <sup>(c)</sup>, Stuart-Maxwell test <sup>(d)</sup>, Mann-Whitney U test <sup>(e)</sup>, Wilcoxon Signed Ranks test <sup>(f)</sup>, or paired t-test <sup>(aa)</sup>, with bold values highlighting statistical significance. 2-3m = Two to three months. 6m = Six months. MRI = Magnetic resonance imaging. ECV = Extracellular volume. LGE = Late gadolinium enhancement.

**Table 5. Spirometry and gas transfer testing results in patients at follow-up and controls.**

|                                                                                                                                                                                                                                                                                                                                                                                                                                                                                                                                                                                                                                                                                                        | COVID-19, 2-3m     | COVID-19, 6m       | Control group      | <i>P</i> -values         |                   |                               |
|--------------------------------------------------------------------------------------------------------------------------------------------------------------------------------------------------------------------------------------------------------------------------------------------------------------------------------------------------------------------------------------------------------------------------------------------------------------------------------------------------------------------------------------------------------------------------------------------------------------------------------------------------------------------------------------------------------|--------------------|--------------------|--------------------|--------------------------|-------------------|-------------------------------|
|                                                                                                                                                                                                                                                                                                                                                                                                                                                                                                                                                                                                                                                                                                        |                    |                    |                    | 2-3m vs Controls         | 6m vs Controls    | 2-3m vs 6m                    |
| <b>Spirometry</b>                                                                                                                                                                                                                                                                                                                                                                                                                                                                                                                                                                                                                                                                                      |                    |                    |                    |                          |                   |                               |
| FVC, % predicted                                                                                                                                                                                                                                                                                                                                                                                                                                                                                                                                                                                                                                                                                       | 108.3 (22.8)       | 119.2 (22.0)       | 131.4 (21.8)       | <b>&lt;0.0001</b>        | <b>0.024</b>      | <b>&lt;0.0001<sup>a</sup></b> |
| <80%                                                                                                                                                                                                                                                                                                                                                                                                                                                                                                                                                                                                                                                                                                   | 7/56 (12.5%)       | 0/46 (0.0%)        | 0/28 (0.0%)        | 0.090 <sup>b</sup>       | ..                | <b>0.016<sup>c</sup></b>      |
| FEV <sub>1</sub> , % predicted                                                                                                                                                                                                                                                                                                                                                                                                                                                                                                                                                                                                                                                                         | 101.4 (19.7)       | 110.7 (18.6)       | 118.7 (22.1)       | <b>0.0004</b>            | 0.10              | <b>&lt;0.0001<sup>a</sup></b> |
| <80%                                                                                                                                                                                                                                                                                                                                                                                                                                                                                                                                                                                                                                                                                                   | 6/56 (10.7%)       | 1/46 (2.2%)        | 1/28 (3.6%)        | 0.42 <sup>b</sup>        | 1.00 <sup>b</sup> | 0.063 <sup>c</sup>            |
| FEV <sub>1</sub> /FVC                                                                                                                                                                                                                                                                                                                                                                                                                                                                                                                                                                                                                                                                                  | 0.77 (0.73 - 0.80) | 0.76 (0.73 - 0.80) | 0.75 (0.70 - 0.78) | <b>0.027<sup>d</sup></b> | 0.24              | 0.051 <sup>a</sup>            |
| Peak expiratory flow, % predicted                                                                                                                                                                                                                                                                                                                                                                                                                                                                                                                                                                                                                                                                      | 105.7 (27.7)       | 108.8 (21.7)       | 114.5 (24.7)       | 0.16                     | 0.31              | 0.74 <sup>a</sup>             |
| <b>Gas Transfer</b>                                                                                                                                                                                                                                                                                                                                                                                                                                                                                                                                                                                                                                                                                    |                    |                    |                    |                          |                   |                               |
| DL <sub>CO</sub> , % of predicted                                                                                                                                                                                                                                                                                                                                                                                                                                                                                                                                                                                                                                                                      | ..                 | 80.9 (16.9)        | ..                 | ..                       | ..                | ..                            |
| <80%                                                                                                                                                                                                                                                                                                                                                                                                                                                                                                                                                                                                                                                                                                   | ..                 | 24/46 (52.2%)      | ..                 | ..                       | ..                | ..                            |
| K <sub>CO</sub> , % of predicted                                                                                                                                                                                                                                                                                                                                                                                                                                                                                                                                                                                                                                                                       | ..                 | 101.8 (18.2)       | ..                 | ..                       | ..                | ..                            |
| <80%                                                                                                                                                                                                                                                                                                                                                                                                                                                                                                                                                                                                                                                                                                   | ..                 | 6/46 (13.0%)       | ..                 | ..                       | ..                | ..                            |
| V <sub>a</sub> , % of predicted                                                                                                                                                                                                                                                                                                                                                                                                                                                                                                                                                                                                                                                                        | ..                 | 79.9 (14.7)        | ..                 | ..                       | ..                | ..                            |
| <80%                                                                                                                                                                                                                                                                                                                                                                                                                                                                                                                                                                                                                                                                                                   | ..                 | 24/46 (52.2%)      | ..                 | ..                       | ..                | ..                            |
| Data are median (IQR) for non-parametric data, mean (SD) for parametric data, and n/N (%), where N is the total number of participants with available data. <i>P</i> -values from independent t-test, paired t-test ( <sup>b</sup> ), Fisher's exact test ( <sup>b</sup> ), McNemar test ( <sup>c</sup> ) or Mann-Whitney U test ( <sup>d</sup> ), with bold values highlighting statistical significance. 2-3m = Two to three months. 6m = Six months. FVC = Forced vital capacity. FEV <sub>1</sub> = Forced expiratory volume in 1 second. DL <sub>CO</sub> = Diffusion capacity for carbon monoxide. K <sub>CO</sub> = Transfer coefficient for carbon monoxide. V <sub>a</sub> = Alveolar volume. |                    |                    |                    |                          |                   |                               |

**Table 6. CPET parameters in patients at follow-up and controls.**

|                                                                      | COVID-19, 2-3m     | COVID-19, 6m       | Control group      | P-values                      |                          |                           |
|----------------------------------------------------------------------|--------------------|--------------------|--------------------|-------------------------------|--------------------------|---------------------------|
|                                                                      |                    |                    |                    | 2-3m vs Controls              | 6m vs Controls           | 2-3m vs 6m                |
| <b>Cardiopulmonary exercise testing</b>                              |                    |                    |                    |                               |                          |                           |
| Maximal tests performed                                              | 26/51 (51.0%)      | 31/42 (73.8%)      | 23/27 (85.2%)      | <b>0.003<sup>a</sup></b>      | 0.37 <sup>a</sup>        | 0.057 <sup>b</sup>        |
| SpO <sub>2</sub> at peak exercise, %                                 | 95.0 (93.8 - 97.0) | 96.0 (95.0 - 97.0) | 96.0 (95.0 - 98.0) | <b>0.003<sup>c</sup></b>      | 0.10 <sup>c</sup>        | <b>0.002<sup>d</sup></b>  |
| <94%                                                                 | 12/51 (23.5%)      | 3/41 (7.3%)        | 1/27 (3.7%)        | <b>0.028<sup>a</sup></b>      | 1.00 <sup>a</sup>        | <b>0.016<sup>b</sup></b>  |
| VO <sub>2</sub> peak (all tests), mls/kg/min                         | 18.0 (14.4 – 21.9) | 20.5 (17.5 - 26.1) | 28.1 (22.1 – 34.0) | <b>&lt;0.001<sup>c</sup></b>  | <b>0.001</b>             | <b>0.001<sup>d</sup></b>  |
| VO <sub>2</sub> max (maximal tests), mls/kg/min                      | 21.1 (16.1 – 27.9) | 22.7 (19.4 - 27.1) | 28.1 (22.1 – 34.5) | <b>0.012<sup>c</sup></b>      | <b>0.044<sup>c</sup></b> | <b>0.006<sup>d</sup></b>  |
| Anaerobic threshold, mls/kg/min                                      | 9.7 (8.3 - 10.7)   | 10.4 (9.0 - 12.2)  | 11.9 (9.3 - 13.9)  | <b>0.001<sup>c</sup></b>      | <b>0.023<sup>c</sup></b> | <b>0.018<sup>d</sup></b>  |
| VO <sub>2</sub> peak (all tests), % of predicted VO <sub>2</sub> max | 80.5 (23.1)        | 93.3 (29.3)        | 112.7 (27.0)       | <b>&lt;0.0001</b>             | <b>0.007</b>             | <b>0.0001<sup>e</sup></b> |
| < 80%                                                                | 28/51 (54.9%)      | 13/42 (31.0%)      | 2/27(7.4%)         | <b>&lt;0.0001<sup>a</sup></b> | <b>0.034<sup>a</sup></b> | <b>0.012<sup>b</sup></b>  |
| VO <sub>2</sub> max (maximal tests), % of predicted                  | 95.5 (19.9)        | 100.7 (27.1)       | 112.3 (27.0)       | <b>0.016</b>                  | 0.12                     | <b>0.003<sup>e</sup></b>  |
| <80%                                                                 | 5/26 (19.2%)       | 6/31 (19.4%)       | 1/23 (4.3%)        | 0.13 <sup>a</sup>             | 0.22 <sup>a</sup>        | 0.63 <sup>b</sup>         |
| Anaerobic threshold (% of predicted VO <sub>2</sub> max)             | 40.7 (36.2 - 47.5) | 42.0 (39.0 - 51.6) | 46.8 (43.3 - 51.3) | <b>0.0005<sup>c</sup></b>     | <b>0.041<sup>c</sup></b> | <b>0.030<sup>d</sup></b>  |
| O <sub>2</sub> pulse, % of predicted max                             | 81.8 (18.2)        | 90.2 (28.3)        | 102.8 (20.8)       | <b>&lt;0.0001</b>             | <b>0.020<sup>c</sup></b> | <b>0.003<sup>d</sup></b>  |
| O <sub>2</sub> pulse (maximal tests), % of predicted max             | 91.4 (18.3)        | 95.2 (26.5)        | 103.3 (20.9)       | <b>0.039</b>                  | 0.13 <sup>c</sup>        | <b>0.011<sup>e</sup></b>  |
| Breathing reserve, % of predicted VEmax                              | 44.8 (15.3)        | 42.4 (15.5)        | 40.7 (11.0)        | 0.22                          | 0.62                     | 0.71 <sup>e</sup>         |
| <20%                                                                 | 3/51 (5.9%)        | 2/42 (4.8%)        | 1/27 (3.7%)        | 1.00 <sup>a</sup>             | 1.00 <sup>a</sup>        | 1.00 <sup>b</sup>         |
| Breathing reserve (maximal tests), % of predicted VEmax              | 34.9 (12.1)        | 38.1 (12.6)        | 38.9 (9.9)         | 0.21                          | 0.80                     | 0.79 <sup>e</sup>         |
| HR recovery slope (maximal tests), bpm                               | 16.6 (7.1)         | 22.2 (11.1)        | 21.9 (7.5)         | <b>0.018</b>                  | 0.67 <sup>c</sup>        | <b>0.001<sup>d</sup></b>  |
| VE/VCO <sub>2</sub> Slope                                            | 33.4 (29.2 - 40.3) | 31.3 (28.6 - 34.5) | 28.2 (26.7 - 30.0) | <b>&lt;0.0001<sup>c</sup></b> | <b>0.002<sup>c</sup></b> | <b>0.033<sup>d</sup></b>  |

|                                                                                                                                                                                                                                                                                                                                                                                                                                                                                                                                                                                                                 |                 |                 |                 |                          |                    |                   |
|-----------------------------------------------------------------------------------------------------------------------------------------------------------------------------------------------------------------------------------------------------------------------------------------------------------------------------------------------------------------------------------------------------------------------------------------------------------------------------------------------------------------------------------------------------------------------------------------------------------------|-----------------|-----------------|-----------------|--------------------------|--------------------|-------------------|
| Oxygen Uptake Efficiency Slope                                                                                                                                                                                                                                                                                                                                                                                                                                                                                                                                                                                  | 1.9 (1.6 - 2.4) | 2.1 (1.7 - 2.8) | 2.7 (2.0 - 3.2) | <b>0.001<sup>c</sup></b> | 0.065 <sup>c</sup> | 0.11 <sup>d</sup> |
| Data are median (IQR) for non-parametric data, mean (SD) for parametric data, and n/N (%), where N is the total number of participants with available data. <i>P</i> -values are from independent t-test, Fisher's exact test ( <sup>a</sup> ), McNemar ( <sup>b</sup> ) test, Mann-Whitney U test ( <sup>c</sup> ), Wilcoxon Signed Ranks test ( <sup>d</sup> ) or paired t-test ( <sup>e</sup> ), with bold values highlighting statistical significance. 2-3m = Two to three months. 6m = Six months. VO <sub>2</sub> = oxygen consumption. VE/VCO <sub>2</sub> = Ventilatory equivalent for carbon dioxide. |                 |                 |                 |                          |                    |                   |

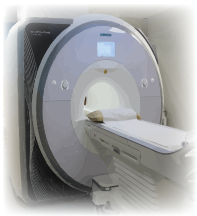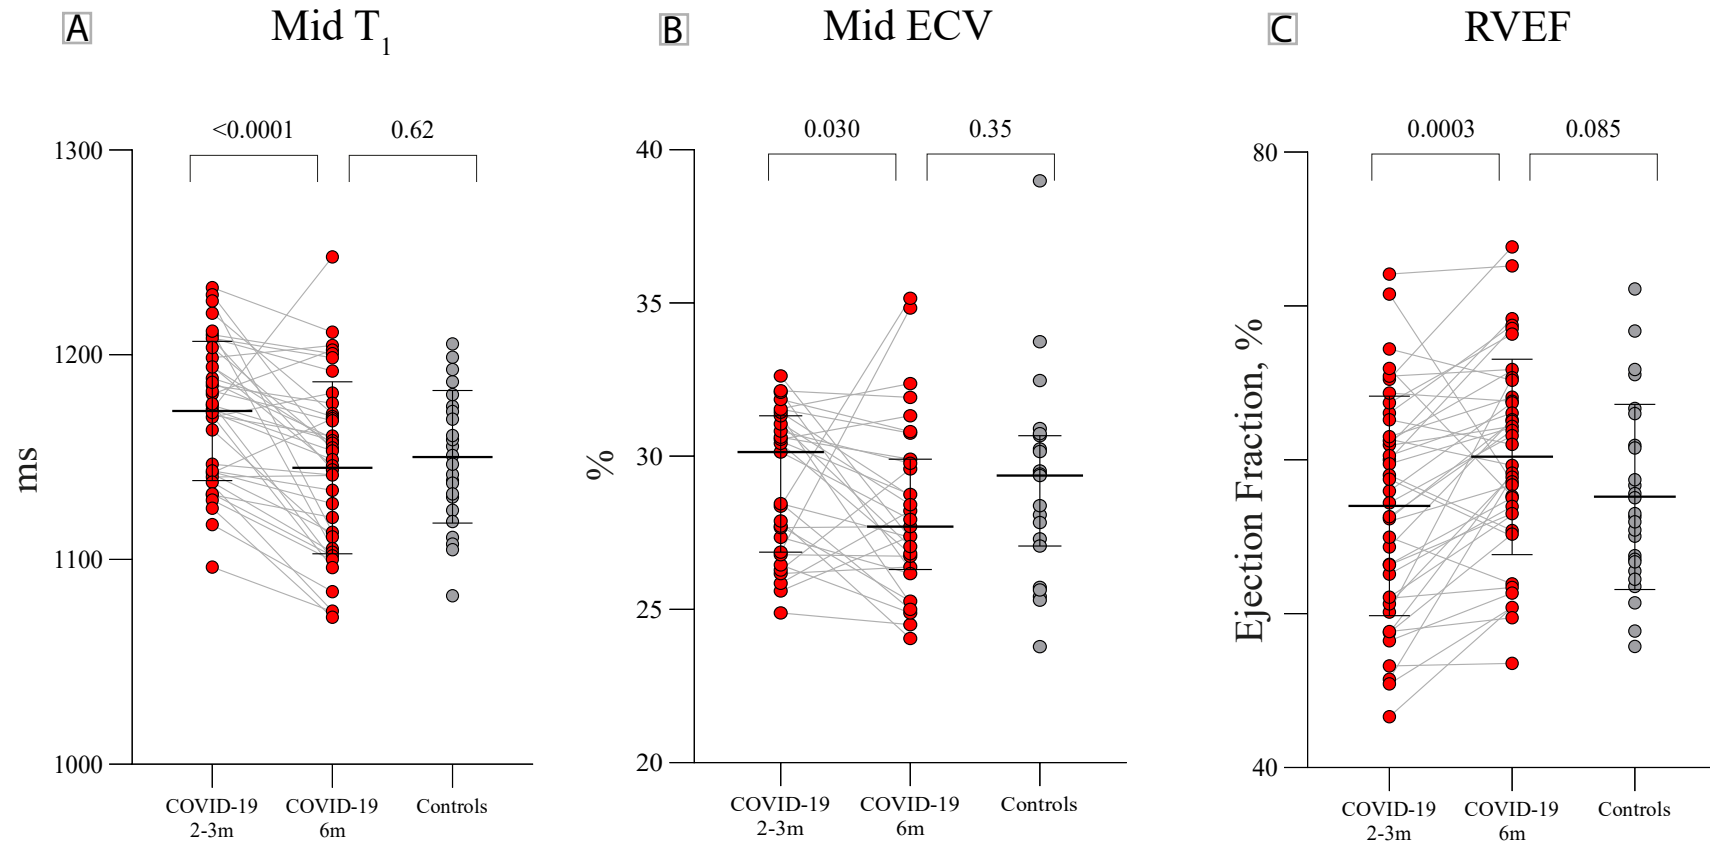

Figure 1. Serial CMR findings in previously hospitalised COVID-19 patients and controls. A: Mid ventricular native  $T_1$  in patients at 2-3 months was higher than controls, and normalized by 6 months. B: Mid ventricular extracellular volume fraction (ECV) in patients at 2-3 months was comparable to controls, but decreased in patients by 6 months. C: Right ventricular ejection fraction in patients at 2-3 months was comparable to controls, and increased by 6 months. P-values are for group differences (COVID-19 2-3 months vs COVID-19 6 months and COVID-19 6 months vs controls).

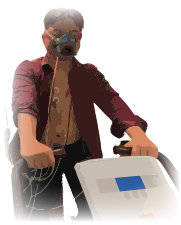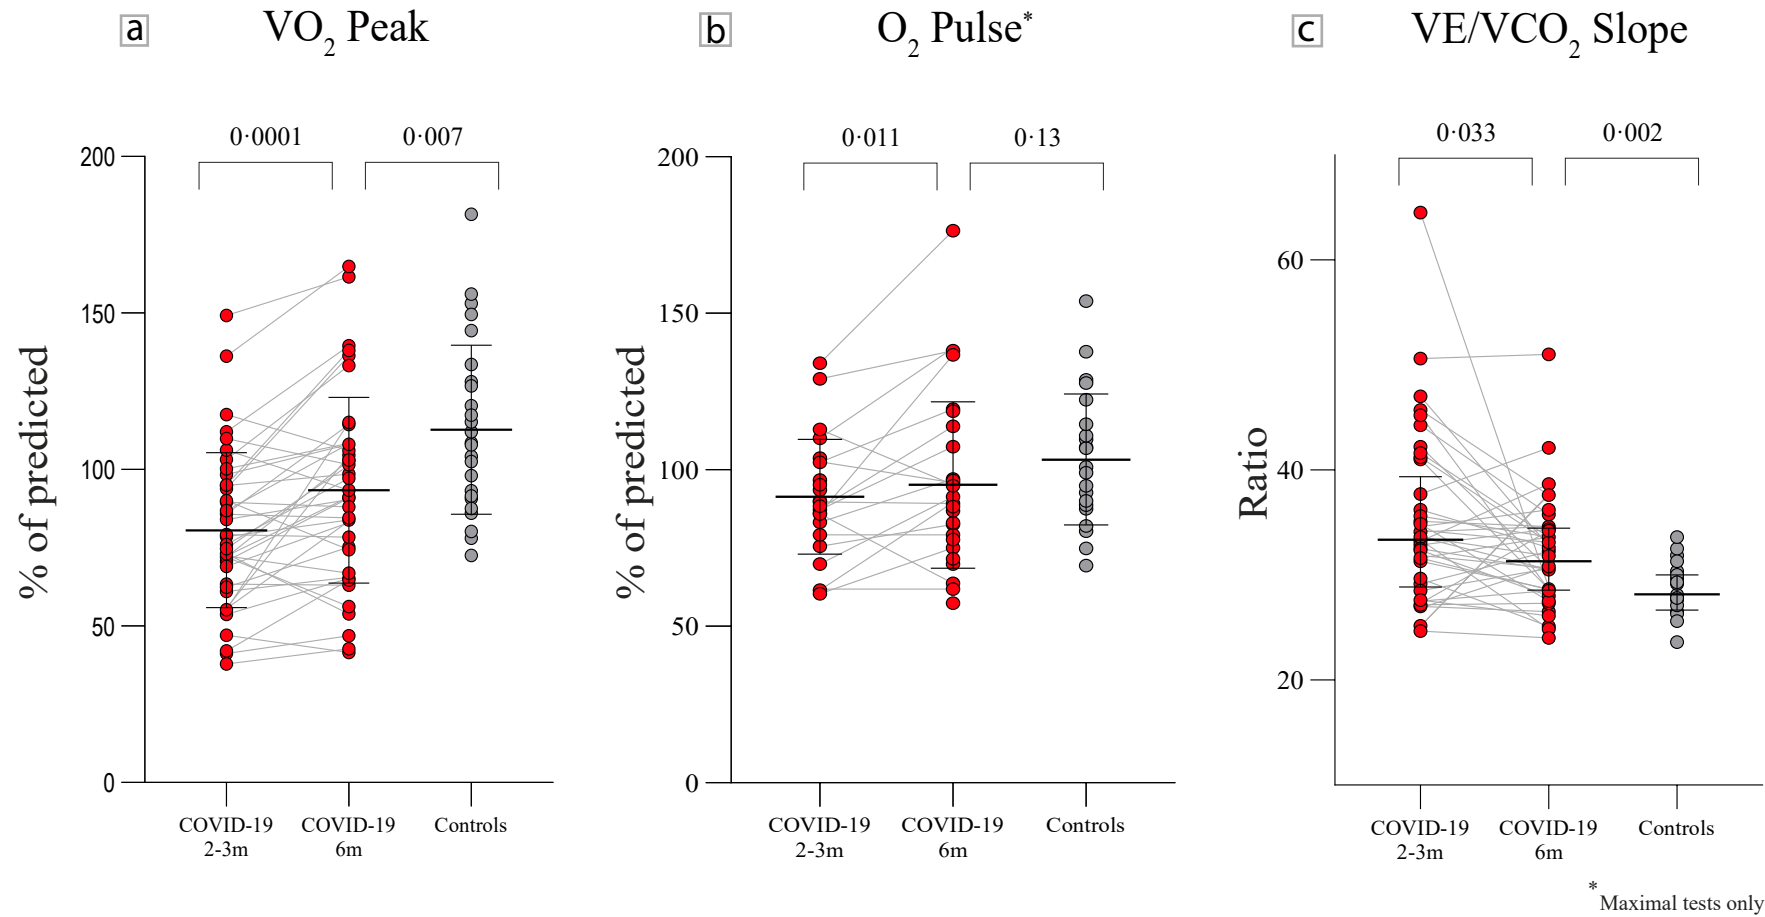

Figure 2. Serial CPET assessments in previously hospitalised COVID-19 patients and controls. A: Peak oxygen consumption ( $\text{VO}_2$  peak) in patients improved from 2-3 months to 6 months, but remained lower than controls. B: Peak oxygen pulse ( $\text{O}_2$  pulse) in patients with maximal tests at 2-3 months was lower compared to controls. By 6 months, this improved and became comparable to controls. C: The ventilatory equivalent for carbon dioxide ( $\text{VE}/\text{VCO}_2$ ) slope in patients improved from 2-3 months to 6 months, but remained high versus controls. P-values are for group differences (COVID-19 2-3 months vs COVID-19 6 months and COVID-19 6 months vs controls).

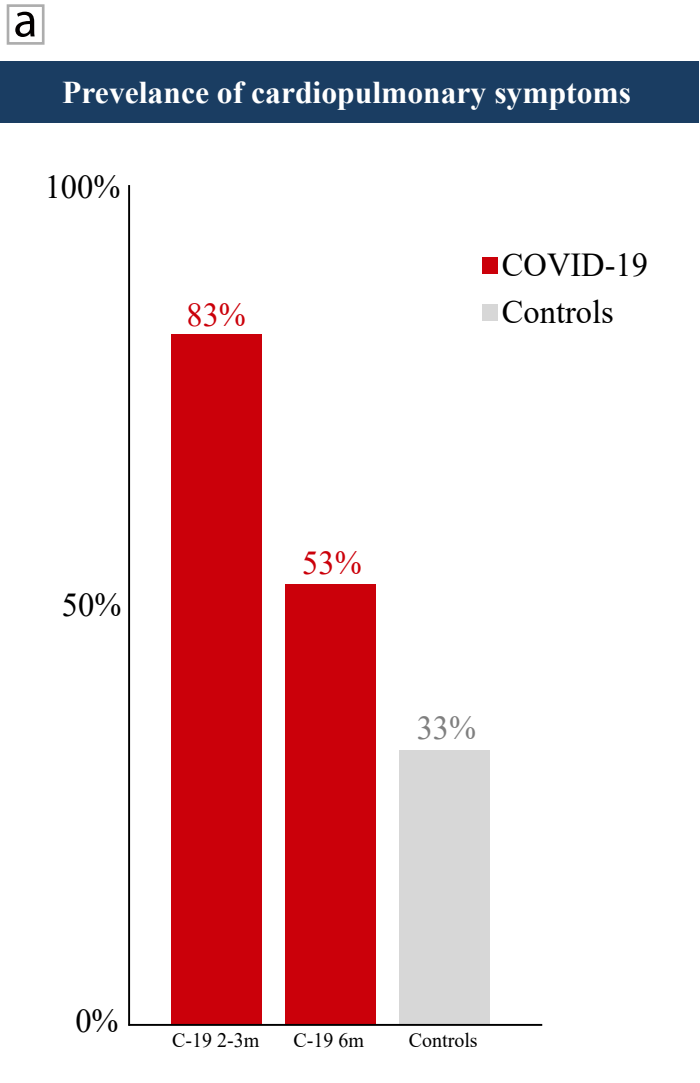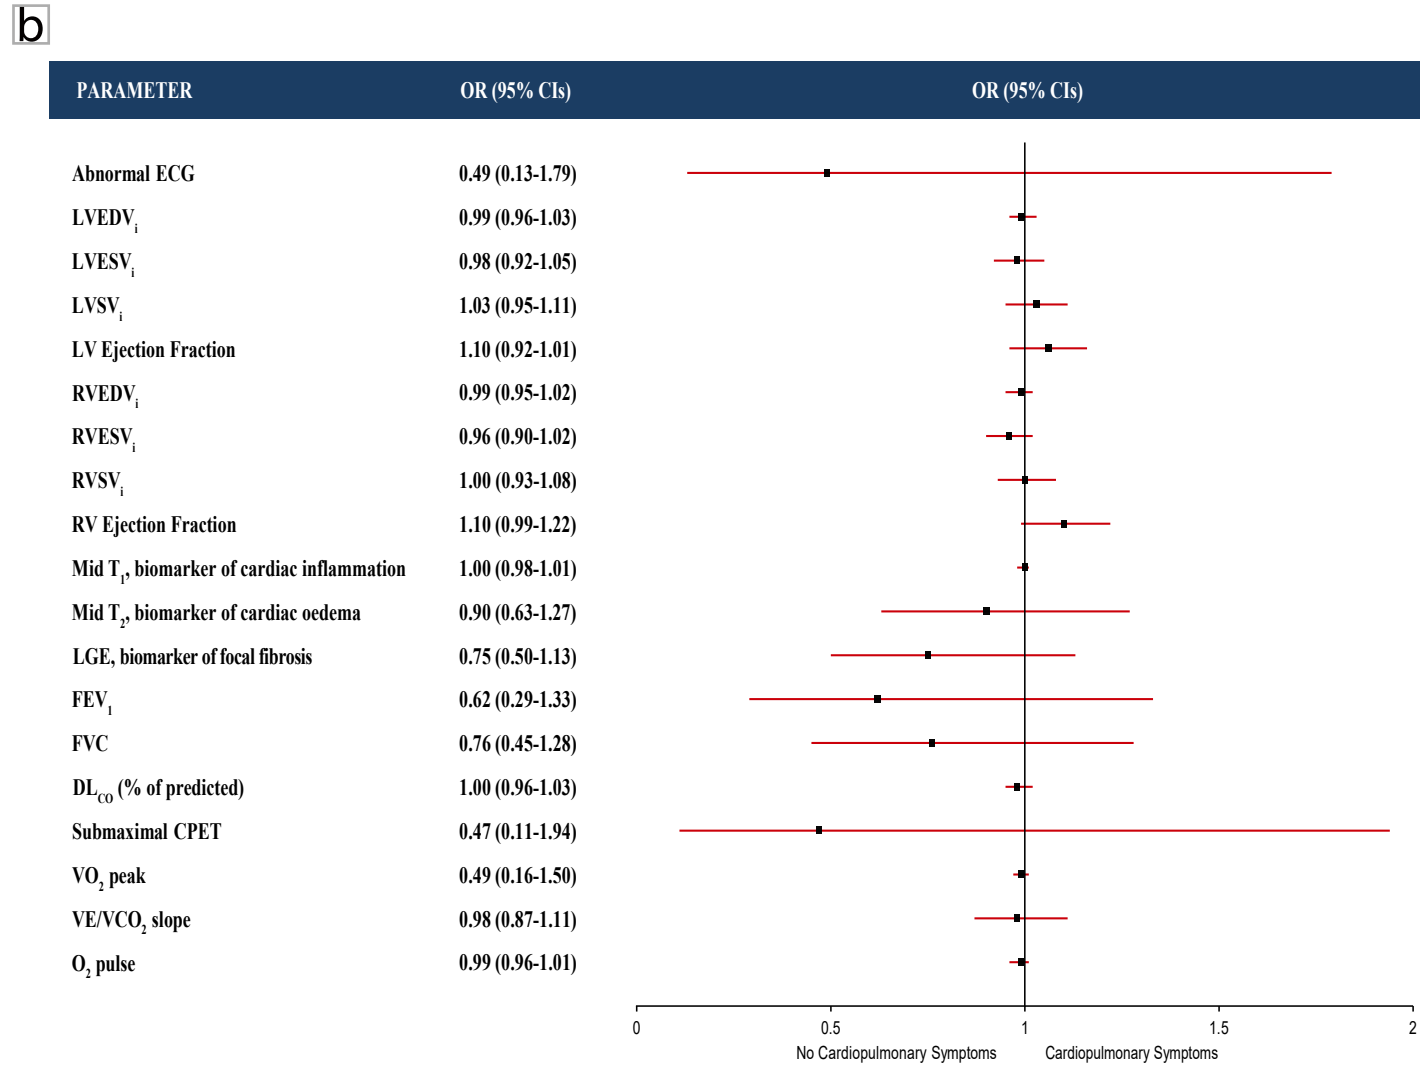

Figure 3. Prevalence and CMR/PFT/CPET determinants of cardiopulmonary symptoms (chest pain, palpitations, syncope, dyspnoea, or dizziness). A: At 2-3 months, 83% of patients experienced at least one cardiopulmonary symptom. By 6 months, this improved to 53% and was comparable to controls. B: Forest plot depicts the odds of having any cardiopulmonary symptom at 6 months using any of the ECG, CMR, PFT, and CPET measures. An abnormal ECG was defined as rhythm abnormalities and/or the presence of bundle branch block, ST-segment elevation/depression or T wave inversion. CMR - Cardiac magnetic resonance. CPET - Cardiopulmonary exercise testing. OR - Odds ratio. CI - Confidence interval. ECG - Electrocardiogram. LVEDV<sub>i</sub> - Left ventricular end-diastolic volume (indexed). LVESV<sub>i</sub> - Left ventricular end-systolic volume (indexed). LVSV<sub>i</sub> - Left ventricular stroke volume (indexed). RVEDV<sub>i</sub> - Right ventricular end-diastolic volume (indexed). RVESV<sub>i</sub> - Right ventricular end-systolic volume (indexed). RVSV<sub>i</sub> - Right ventricular stroke volume (indexed). LGE - Late gadolinium enhancement. DL<sub>CO</sub> - Diffusing capacity for carbon monoxide. pVO<sub>2</sub> - Peak oxygen consumption. VE/VCO<sub>2</sub> - Ventilatory equivalent for carbon dioxide. O<sub>2</sub> pulse - Oxygen pulse.
